# 1 Robust cell tracking in epithelial tissues through identification 2 of maximum common subgraphs

3 Jochen Kursawe<sup>1,\*</sup>, Rémi Bardenet<sup>2</sup>, Jeremiah J. Zartman<sup>3</sup>, Ruth E. Baker<sup>1</sup>, Alexander G.  
4 Fletcher<sup>4,5,\*</sup>

5 <sup>1</sup> Mathematical Institute, University of Oxford, Andrew Wiles Building, Radcliffe Observatory  
6 Quarter, Woodstock Road, Oxford, OX2 6GG, UK

7 <sup>2</sup> CNRS & CRISAL, Université de Lille, 59651 Villeneuve d'Ascq, France

8 <sup>3</sup> Department of Chemical and Biomolecular Engineering, University of Notre Dame, 182  
9 Fitzpatrick Hall, Notre Dame, IN 46556, USA

10 <sup>4</sup> School of Mathematics and Statistics, University of Sheffield, Hicks Building, Hounsfield  
11 Road, Sheffield, S3 7RH, UK

12 <sup>5</sup> Bateson Centre, University of Sheffield, Sheffield, S10 2TN, UK

13 \* E-mail: [kursawe@maths.ox.ac.uk](mailto:kursawe@maths.ox.ac.uk), [a.g.fletcher@sheffield.ac.uk](mailto:a.g.fletcher@sheffield.ac.uk)

14 **Data accessibility:** The datasets and code supporting this article are publicly available under  
15 <https://github.com/kursawe/MCSTracker>.

16 **Competing interests:** We have no competing interests.

17 **Authors' contributions:** JK, RB, JJZ, REB, and AGF conceived the study and contributed  
18 to the manuscript. JK developed the algorithm and carried out the data segmentation and  
19 performance analysis. JK, REB, and AGF drafted the manuscript. JJZ provided microscopy  
20 data. All authors gave final approval for publication.

21 **Keywords:** Cell tracking, planar graphs, maximum common subgraph, epithelial sheets

## 22 **Abstract**

23 Tracking of cells in live-imaging microscopy videos of epithelial sheets is a powerful tool for inves-  
24 tigating fundamental processes in embryonic development. Observing the growth, proliferation,  
25 intercalation, and apoptosis of individual cells helps us understand how global morphogenetic  
26 processes, such as tissue invagination or extension, are locally regulated and controlled. Accu-  
27 rate cell tracking requires correctly resolving cells moving in and out of field of view between  
28 frames, cell neighbour exchanges, cell removal and cell division events. Here, we present a novel  
29 algorithm for epithelial cell tracking. The algorithm exploits the graph-theoretic concept of  
30 a ‘maximum common subgraph’ to track cells between successive frames of a video. It does  
31 not require the adjustment of tissue-specific parameters, and scales in polynomial time with  
32 tissue size. The algorithm does not rely on precise positional information and thus permits large  
33 cell movements between frames, enabling cell tracking in data sets acquired at low temporal  
34 resolution due to experimental constraints such as phototoxicity.

## 35 1 Introduction

36 Live-imaging microscopy is a powerful, and increasingly quantitative, tool for gaining insight into  
37 fundamental processes during embryonic development [1–3]. Quantitative information on cell  
38 growth, proliferation, death, shape changes and movement extracted from live-imaging reveals  
39 how such processes are regulated to give correct tissue-level behaviour. This approach has  
40 been particularly successful in characterising the growth and patterning of embryonic epithelial  
41 tissues in a number of model organisms [4–9].

42 A common experimental technique for visualising cell shapes in an epithelial sheet is to  
43 fluorescently tag a binding molecule, such as E-cadherin (figure 1A). The analysis of time-lapse  
44 microscopy data obtained from such tissues is extremely challenging [2, 3], especially in cases  
45 of imaging data of rapidly evolving tissues, and when limitations of, for example, microscope  
46 speed, imaging resolution or phototoxicity inhibit the creation of datasets with high temporal  
47 and spatial resolution.

48 The analysis of time-lapse microscopy data comprises two major steps: segmentation and  
49 tracking (registration). Segmentation must be performed for each frame of a video and in-  
50 volves the identification of objects and landmarks, such as cell shapes (figure 1B). Automated  
51 segmentation is hindered by various factors such as noise in fluorescent signals, uneven illu-  
52 mination of the sample, or overlapping cells in a two-dimensional projection. Often, manual  
53 correction is necessary to address over-segmentation, where too many cells are detected, or  
54 under-segmentation, where too few cells are detected [10–12]. Tracking involves the association  
55 of segmented cells across video frames (figure 1C) and requires resolving cellular movement, cell  
56 division, cell death, and cells entering and leaving the field of view [12].

57 Numerous algorithms are available for the segmentation and tracking of cellular-resolution  
58 microscopy data [10, 11, 13]. Common methods for cell tracking utilize optimization techniques  
59 to minimise differences in cellular properties between two frames [11, 14–17]. The min-cost  
60 max-flow algorithm [14] uses linear integer programming to minimise differences in cell areas,  
61 perimeters, orientations, and locations between frames, whereas multiple-parameter tracking  
62 [15] employs global optimization to minimize differences in cell shapes as well as locations.  
63 In contrast, multitemporal association tracking [16, 17] minimises differences in cell locations  
64 and sizes by using a probabilistic approach that finds the most likely extension to existing cell

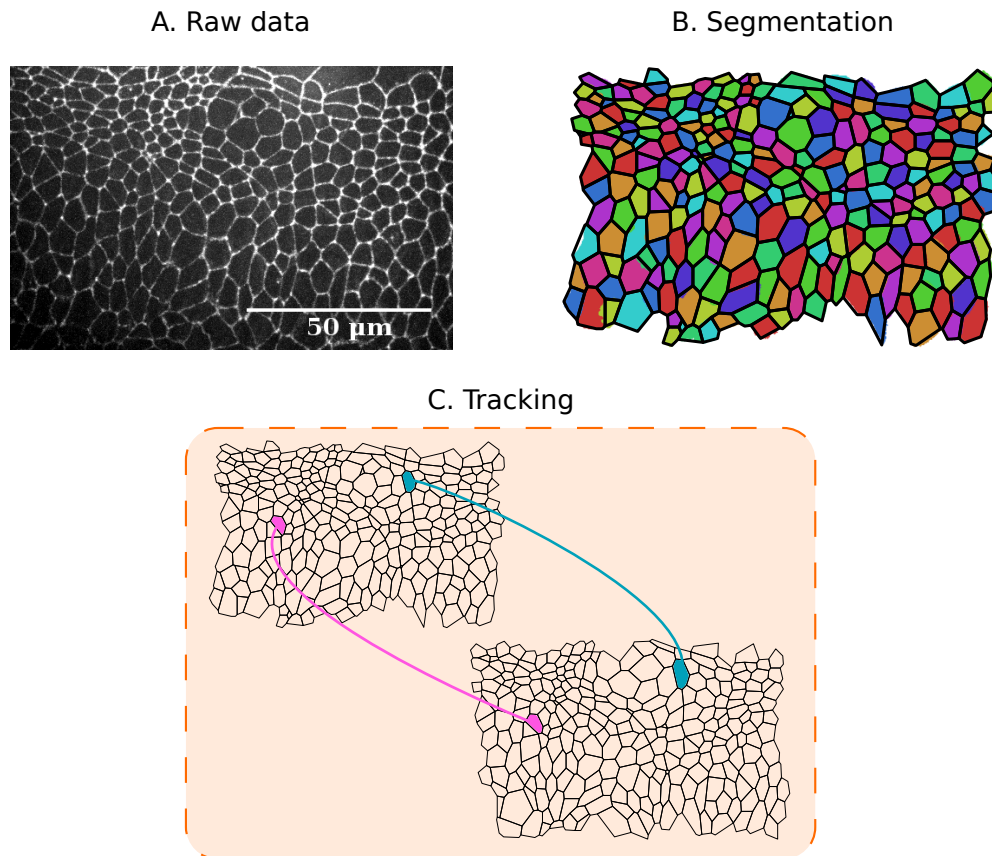

Figure 1: Pipeline for analysing epithelial tissues. (A) Example raw data. Frame of a live-imaging microscopy video of the lateral epidermis of a stage-eleven *Drosophila* embryo, expressing DE-Cadherin::GFP. See Experimental Methods for details. (B) Segmentation of this image, showing cell shapes (coloured regions) and polygonal approximation based on three-cell junctions (black lines). See Methods section for details of segmentation. (C) Cell tracking involves registering individual cells across consecutive segmented images.

65 trajectories. Chain-graph models [18] minimise differences in cell velocity while overcoming mis-  
66 segmentation by verifying that each segmented object continues or begins a cell trajectory in  
67 successive frames. Optical flow (‘warping’) between successive frames can be used to guide cell  
68 tracking as well as segmentation [19]. It is also possible to combine segmentation and tracking  
69 of 2D microscopy videos by interpreting time as a third spatial dimension and employing 3D  
70 segmentation techniques [20].

71 The nearest-neighbour method associates two cells in consecutive frames with each other if  
72 their respective centroids have minimal distance within the field of view [10], or if their overlap  
73 in pixels within the field of view is maximal [21, 22]. Particle image velocimetry, a technique  
74 originally developed to analyse fluid flow [23], has also been employed to track cells in epithelial  
75 tissues [24].

76 Software implementations and computational tools for cell tracking include FARSIGHT [25]  
77 (segmentation only), SeedWaterSegmenter [10] (nearest-neighbour tracking), ilastik [18] (chain-  
78 graph models), Tufts Tissue Tracker [11] (min-cost max-flow algorithm), Tracking with Gaus-  
79 sian Mixture Models [26] (nearest-neighbour tracking), Packing Analyzer [27] (particle image  
80 velocimetry) and EpiTools [13] (nearest-neighbour tracking). These algorithms and software  
81 tools primarily rely on there being small differences in cell positions and shapes across consecu-  
82 tive images. Their performance is therefore hindered when analysing data from *in vivo* studies  
83 where phototoxicity provides a barrier to high temporal resolution imaging [28–30]. To address  
84 this limitation, we propose a novel algorithm for cell tracking that uses only the connectivity of  
85 cell apical surfaces (figure 1). By representing the cell sheet as a physical network in which each  
86 pair of adjacent cells shares an edge, we show that cells can be tracked between successive frames  
87 by finding the *maximum common subgraph* (MCS) of the two networks: the largest network of  
88 connected cells that is contained in these two consecutive frames. It is then possible to track  
89 any remaining cells based on their adjacency to cells tracked using the MCS. Our algorithm  
90 does not require the tuning of parameters to a specific application, and scales in subquadratic  
91 time with the number of cells in the sheet, making it amenable to the analysis of large tissues.  
92 We demonstrate here that our algorithm resolves tissue movements, cell neighbour ex-  
93 changes, cell division, and cell removal (for example, by delamination, extrusion, or death)  
94 in a large number of *in silico* data sets, and successfully tracks cells across sample segmented  
95 frames from *in vivo* microscopy data. The remainder of the paper is structured as follows. In  
96 Section 2 we describe the technical details. In Section 3 we analyse the performance of the  
97 algorithm on *in silico* and *in vivo* datasets. Finally, in Section 4 we discuss future extensions  
98 and potential applications.

## 99 2 Methods

100 We begin with a conceptual overview of our cell tracking algorithm; a detailed description of  
101 each step of the algorithm is provided in the section ‘2.1 Mathematical formulation’. The input  
102 to the algorithm is a set of segmented images obtained from a live-imaging microscopy data set  
103 of the apical surface of an epithelial cell sheet. For each image, the segmentation is assumed  
104 to have correctly identified which cells are adjacent and the locations of junctions where three

105 or more cells meet. This information is used to generate a polygonal approximation to the cell  
106 tessellation (figure 1B-C). The statistics of polygonal approximations are commonly used to  
107 characterise and explore morphological processes in epithelial tissues [11, 31–34].

108 Our algorithm tracks cells between each pair of consecutive images in three steps (figure 2).  
109 First, we use a MCS-approach [35, 36] to generate an initial bijection between the two images  
110 that includes every cell whose connections to its neighbours do not change between images, e.g.  
111 due to cell rearrangements (figure 2B). Second, we remove from the bijection any cells that have  
112 less than three isolated connections to other cells in the MCS (figure 2B-C), since these cells are  
113 likely to have been matched incorrectly. Third, we extend the MCS to track any remaining cells  
114 that were not included in the bijection and we identify cell division and ‘removal’ (delamination,  
115 extrusion or death) events (figure 2D) through characteristic changes to the local cell network  
116 under these events.

117 In the first of the three steps shown in figure 2, the MCS is constructed by iterative extension  
118 from an initial seed. The technical details of this iterative extension are described below. Briefly,  
119 this initial seed is found by identifying two cells in consecutive images whose neighbourhoods  
120 have identical graph structures. The full MCS is then constructed by iteratively adding cells  
121 after inspecting MCSs of the cells’ extended neighbourhoods.

## 122 2.1 Mathematical formulation

123 **Preliminaries** We begin by introducing the graph theoretic terminology and notation [37]  
124 used to describe our algorithm. We consider each pair of successive segmented images as vertex-  
125 labelled graphs<sup>1</sup>  $G = (V, E)$  and  $G' = (V', E')$ , respectively. Here and throughout, we use  
126 a prime symbol  $'$  to refer to the latter of the consecutive images. Each vertex in  $G$  or  $G'$   
127 corresponds to one cell in the respective segmentation, and two vertices share an edge in the  
128 graph if the corresponding cells are adjacent. Throughout, we assume the graphs  $G$  and  $G'$   
129 to be simple, planar and connected; we emphasise that these graphs represent the dual of the  
130 polygonal cell packing (figure 3A). These assumptions are reasonable in the case of simple  
131 epithelial cell sheets.

132 The vertex labelling of  $G$  is defined by three functions,  $p_G : V \rightarrow \mathbb{N}$ ,  $x_G : V \rightarrow \mathbb{R}$  and

---

<sup>1</sup>A *graph* is an ordered pair  $G = (V, E)$ , where  $V \subseteq \mathbb{N}$  and  $E \subseteq \{A \subseteq V : |A| = 2\}$ . The elements of  $V$  and  $E$  are called the *vertices* and *edges* of  $G$ , respectively. Given a graph  $G = (V, E)$ , a *vertex labelling* is a function of  $V$  to a set of labels. With this function,  $G$  is called a *vertex-labelled* graph.

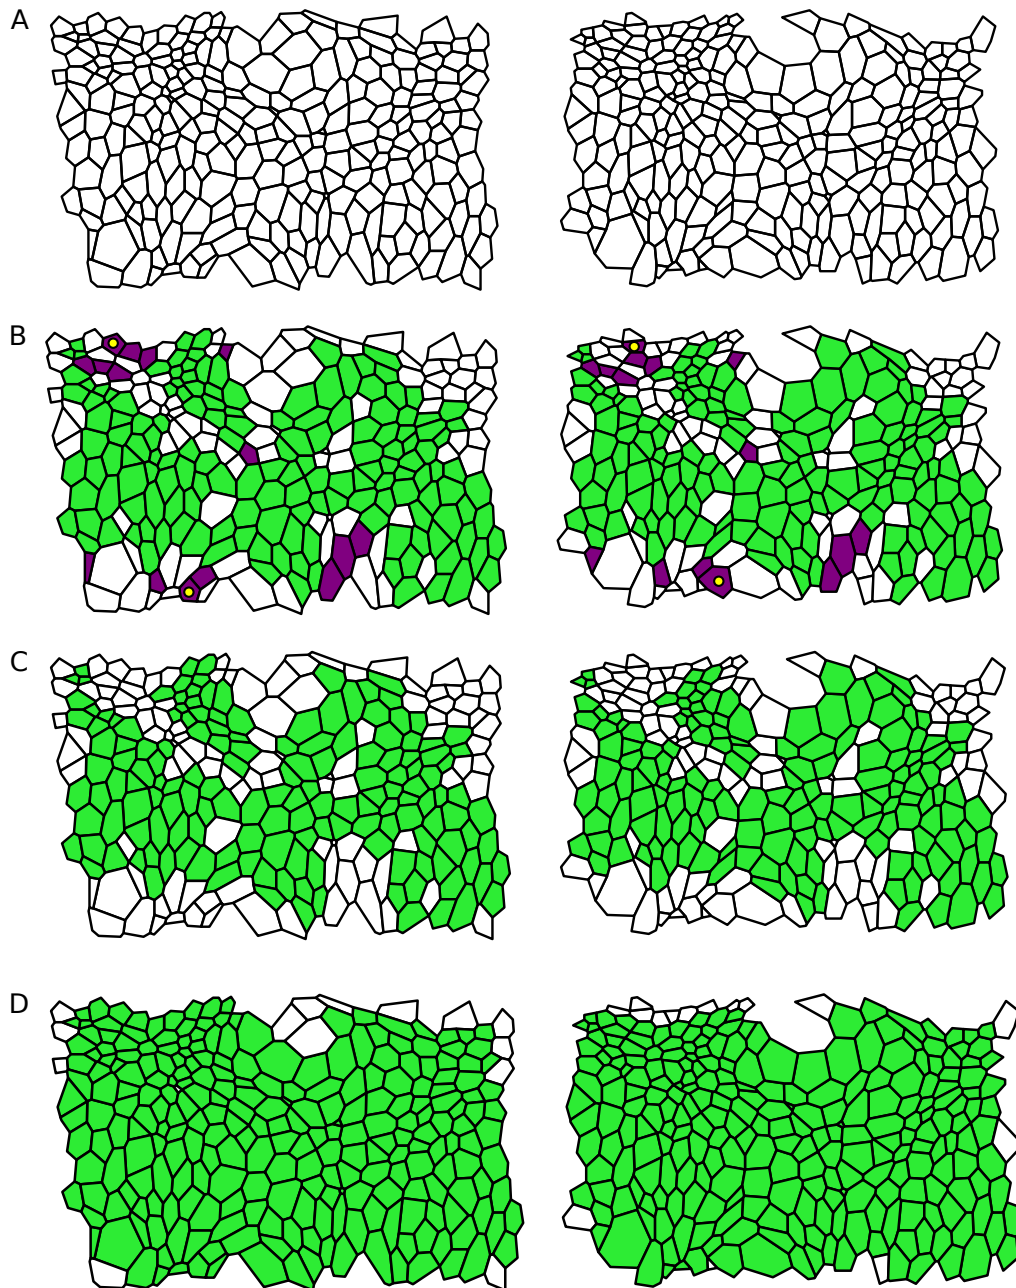

Figure 2: Illustration of our cell tracking algorithm. (A) Two consecutive segmented time-lapse images (left and right columns) of the lateral epidermis of a stage-eleven *Drosophila* embryo, taken five minutes apart. See Experimental Methods for details. There are several cell neighbour exchanges between these images. (B) We first identify a cell mapping between the two graphs based on the conserved MCS. This includes correctly tracked (green/light) cells and weakly connected cells (purple/dark). Here, the conserved MCS incorrectly tracks two cells (yellow/light dots). (C) Weakly connected cells are removed from the conserved MCS to prevent mismatches. (D) An extended tracking mapping is constructed, which includes more cells. See Methods section for details. The remaining white cells enter or leave the frame of view between images and therefore are not tracked.

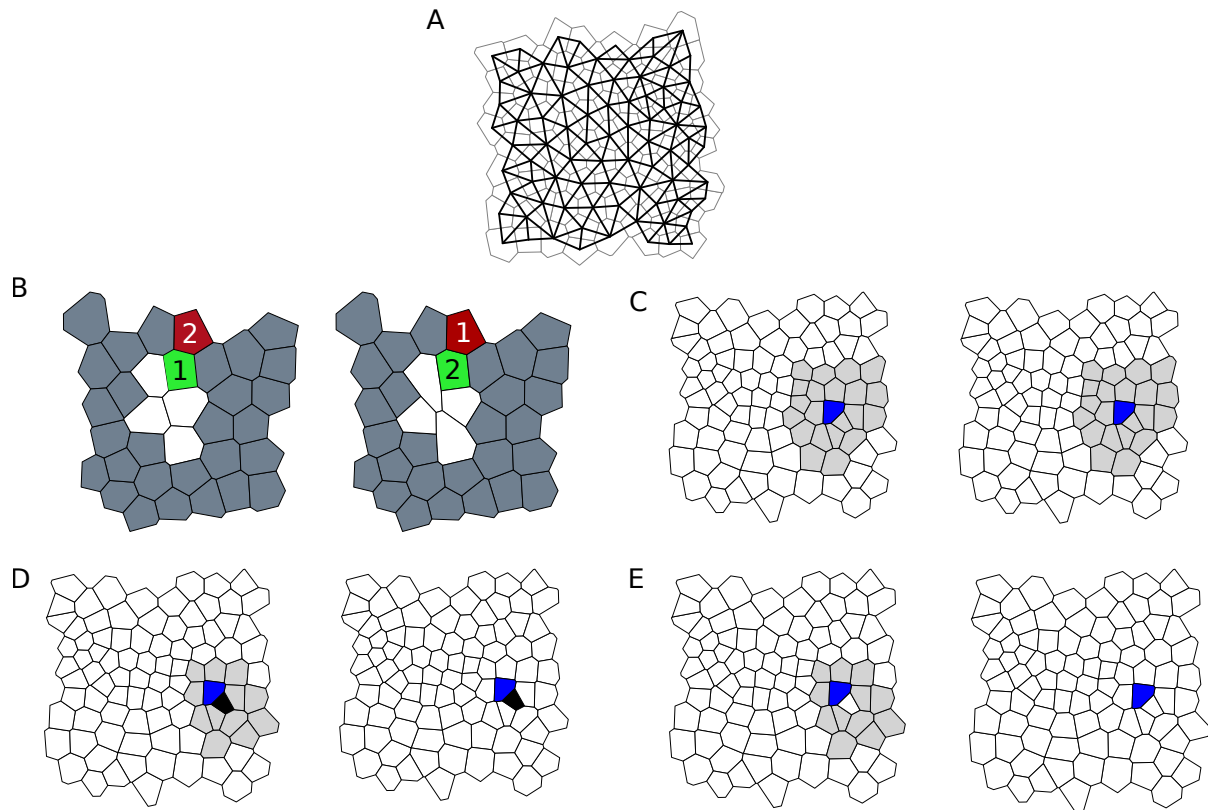

Figure 3: Construction of the MCS. (A) Overlay of a polygonal tessellation (grey) and the corresponding cell network (black). Each cell corresponds to one vertex in the network, and two vertices share an edge if the corresponding cells are adjacent. The network of cells is used by the algorithm to determine the MCS between tessellations corresponding to consecutive time frames in a microscopy video. Note that the network degree of a cell and its polygon number differ at the boundary of the tissue. For example, the highlighted cell has polygon number five and network degree three. (B) The dark grey cells are members of the conserved MCS between the two *in silico* tissues. In this example, two distinct MCSs are possible. Both MCSs include all highlighted grey, green, and red cells. The two MCSs differ in the way the numbered cells are mapped. The first MCS includes the cell pairings as indicated by the green (light) and red (dark) cells. The second MCS includes the pairings as indicated by the numbers one and two. White cells are not members of the MCSs. (C) The algorithm picks a first match of cells for the MCS (blue) if their neighbourhoods form identical networks. The considered neighbourhood includes all neighbours and second nearest neighbours and is shown in grey. (D-E) Additional cells are added to the MCS iteratively by inspecting the MCS between the grey area on the left, and the white area on the right. In (D), where the black cell is paired correctly, the local MCS is larger than in (E), where the selected cell is not considered for mapping. Hence, the pairing of black cells is added to the MCS.

133  $y_G : V \rightarrow \mathbb{R}$ . For a vertex  $v \in V$ , we refer to  $p_G(v)$ ,  $x_G(v)$  and  $y_G(v)$  as the *polygon number*,  
 134 *x coordinate* and *y coordinate* of  $v$ , respectively. For a given vertex, the polygon number is the  
 135 number of neighbours of the corresponding cell, and the *x* and *y* coordinates are defined by  
 136 the centroid of that cell. An overlay of a polygonal tessellation with the corresponding graph



137 structure is shown in figure 3A.

138 Let  $\phi$  be an isomorphism<sup>2</sup> from  $A \subseteq V$  to  $B \subseteq V'$  such that for all  $v \in A$ , we have  
139  $p_G(v) = p_{G'}(\phi(v))$  and for all  $x, y \in A$ , we have  $\{x, y\} \in E \Leftrightarrow \{\phi(x), \phi(y)\} \in E'$ . We call  $\phi$  a  
140 *cell mapping* from  $G$  to  $G'$  and define the *size* of  $\phi$  to be  $|\phi| = |A|$ .

141 Let  $S$  denote the set of cell mappings from subgraphs of  $G$  to subgraphs of  $G'$ . Suppose that  
142  $\phi_{MCS} \in S$  has maximum size, i.e.  $|\phi_{MCS}| \geq |\phi| \quad \forall \phi \in S$ , and let  $V_{MCS} \subseteq V$  denote the domain  
143 of  $\phi_{MCS}$ . We call the subgraph induced<sup>3</sup> by  $V_{MCS}$  a *maximum common subgraph* (MCS) of  $G$   
144 and  $G'$  (this may not be unique). A non-trivial, i.e. non-empty, MCS exists if there are two  
145 vertices  $v \in V$  and  $v' \in V'$  that have the same polygon number, which is always true in our  
146 test cases. Our definition of a MCS differs slightly from previous definitions since it requires  
147 equivalence of the polygon number in addition to equivalence of edges [35, 38]. Note that the  
148 polygon number and degree<sup>4</sup> of a vertex may not coincide for cells at the tissue boundary  
149 (figure 3A).

150 Suppose that  $G$  and  $G'$  have  $k$  MCSs, with associated cell mappings  $\phi_1, \dots, \phi_k$ . Let  $V_c$   
151 denote the set of vertices in  $V$  that are mapped to the same vertex in  $V'$  by every cell mapping  
152  $\phi_1, \dots, \phi_k$ , and let  $\phi_c$  denote the restriction of  $\phi_1$  (or, equivalently, any of the cell mappings)  
153 to  $V_c$ . We call  $V_c$  the *conserved MCS* of  $G$  and  $G'$ . In contrast to MCSs, conserved MCSs are  
154 unique. Examples of MCSs and conserved MCSs are illustrated in figure 3B.

## 155 Construction of the conserved MCS

156 In general, finding a MCS between two graphs is an NP-hard problem [35]. Here we adapt an  
157 efficient MCS detection algorithm [36] by exploiting graph planarity to reduce computational  
158 complexity. Instead of exploring all possible combinations of vertex-to-vertex matches [36] we  
159 construct the conserved MCS iteratively by finding the MCSs of small subgraphs of  $G$  and  $G'$ .  
160 To describe this construction we make use of the following definitions.

161 For a graph  $G = (V, E)$ , we define the *extended neighbourhood* of a vertex  $v \in V$  to be  
162 the set  $\Gamma_G^{(2)}(v) = \{w \in V : d_G(v, w) \leq 2\}$ , where  $d_G$  denotes graph distance<sup>5</sup>. The extended

---

<sup>2</sup>Graphs  $G = (V, E)$  and  $G' = (V', E')$  are *isomorphic* if there exists a bijection  $\phi : V \rightarrow V'$  such that, for each  $x, y \in V$ , we have  $\{x, y\} \in E \Leftrightarrow \{\phi(x), \phi(y)\} \in E'$ . We say that  $\phi$  is an *isomorphism*.

<sup>3</sup>A graph  $G' = (V', E')$  is a *subgraph* of  $G = (V, E)$  if  $V' \subseteq V$  and  $E' \subseteq E$ . The subgraph  $G'$  of  $G$  is *induced* by the vertices  $A \subseteq V$  if it contains all edges whose endpoints are both in  $A$ .

<sup>4</sup>The *degree* of a vertex  $v$  of a graph  $G = (V, E)$  is the number of incident edges,  $\deg_G(v) = |\{w \in V : \{v, w\} \in E\}|$ .

<sup>5</sup>The *distance*  $d_G(v, w)$  between two vertices  $v, w$  of a graph  $G$  is the number of edges in a shortest path

163 neighbourhood contains  $v$ , all neighbours of  $v$ , and all second nearest neighbours of  $v$ . An  
 164 example of an extended neighbourhood is illustrated in figure 3C as the set of highlighted blue  
 165 and grey cells.

166 Let  $\rho : A \rightarrow B$  be a cell mapping,  $v \in V \setminus A$  and  $v' \in V' \setminus B$  be vertices in successive graphs,  
 167 and  $S_{LM}^\rho$  be the set of cell mappings whose domains lie in  $\Gamma_G^{(2)}(v)$ , whose images lie in  $V'$ , which  
 168 map  $v$  to  $v'$ , and which map  $v_a$  to  $\rho(v_a)$  for all  $v_a \in A \cap \Gamma_G^{(2)}(v)$ . Suppose that  $\phi_{LM}^\rho \in S_{LM}^\rho$  has  
 169 maximum size, i.e.  $|\phi_{LM}^\rho| \geq |\phi| \quad \forall \phi \in S_{LM}^\rho$ , and let  $V_{LM}^\rho$  denote the domain of  $\phi_{LM}^\rho$ . We call  
 170 the subgraph induced by  $V_{LM}^\rho$  a *local MCS* (LM) of  $v$  and  $v'$  under  $\rho$ .

171 Further, let  $S_{RLM}^\rho$  denote the set of cell mappings whose domains lie in the extended  
 172 neighbourhood of  $v$  excluding  $v$ , whose images lie in  $V'$ , and which map  $v_a$  to  $\rho(v_a)$  for all  
 173  $v_a \in A \cap \Gamma_G^{(2)}(v)$ . Suppose that  $\phi_{RLM}^\rho \in S_{RLM}^\rho$  has maximum size and let  $V_{RLM}^\rho$  denote the  
 174 domain of  $\phi_{RLM}^\rho$ . We call the subgraph induced by  $V_{RLM}^\rho$  a *reduced local MCS* (RLM) of  $v$   
 175 under  $\rho$ .

176 Finally, we say that  $v' \in V' \setminus B$  is *mappable* to  $v \in V \setminus A$  under  $\rho$  if  $p_G(v) = p_{G'}(v')$ ,  
 177  $d_G(w, v) = 1 \Leftrightarrow d_{G'}(\rho(w), v') = 1$  for all  $w \in A$ , and if  $(x_G(v) - x_{G'}(v'))^2 + (y_G(v) - y_{G'}(v'))^2 <$   
 178  $d_{\max}^2$ , where throughout this paper we choose the threshold  $d_{\max}$  to be ten times the average  
 179 cell diameter in the tissue (defined as the square root of the average area of the polygonal  
 180 approximations of the cells in the segmented microscopy image). The threshold  $d_{\max}$  is used in  
 181 our MCS finding algorithm to restrict any possible vertex pairings to those that are in physical  
 182 proximity. This restriction reduces the size of the search space.

183 **Initial step** To construct the conserved MCS, we first define a cell mapping  $\phi_1$  between single  
 184 vertices of the consecutive graphs (figure 3C). Formally, we search through vertices in  $V$  and  
 185  $V'$  to find  $v_1 \in V$ ,  $v'_1 \in V'$  such that the order<sup>6</sup> of any local MCS of  $v_1$  and  $v'_1$  under the cell  
 186 mapping<sup>7</sup>  $\phi_0 : \emptyset \rightarrow \emptyset$  is equal to  $|\Gamma_G^2(v_1)|$  and, for any vertex  $v'_2 \in V' \setminus \{v'_1\}$  that is mappable  
 187 to  $v_1$  under  $\phi_0$ , the order of any local MCS of  $v_1$  and  $v'_2$  is strictly less than  $|\Gamma_G^2(v_1)|$ . We then  
 188 define a first cell mapping  $\phi_1 : V_1 \rightarrow V'_1$  with  $V_1 = \{v_1\}$ ,  $V'_1 = \{v'_1\}$  and a first *set of inspected*  
 189 *vertices*  $V_1^{\text{ins}} = \emptyset$ . Since we wish to use the MCS to aid our cell tracking, the equivalence of  
 190 the extended neighbourhoods of  $v_1$  and  $v'_1$  gives us confidence that the corresponding cells are

---

connecting them. If no such path exists, then the distance is set equal to  $\infty$ .

<sup>6</sup>The *order* of  $G$  is the number of its vertices,  $|V|$ .

<sup>7</sup>Here and throughout,  $\emptyset$  denotes the empty set.

191 correctly tracked under  $\phi_1$ . If we cannot find an initial cell mapping, then the algorithm halts;  
192 this means that the cell connectivity changes so quickly that the extended neighbourhood of  
193 every cell differs between consecutive images.

194 **Iterative extension** Our next step is to iteratively construct a cell mapping  $\phi_{\text{cell}} : V_{\text{cell}} \rightarrow$   
195  $V'_{\text{cell}}$  for the conserved MCS between  $G$  and  $G'$ , as follows.

196 For  $n = 1, 2, \dots$ , given a cell mapping  $\phi_n : V_n \rightarrow V'_n$  and a set of already inspected vertices  
197  $V_n^{\text{ins}} \subseteq V$ , we determine the set of vertices  $S_n \subseteq \Gamma_G(V_n) \setminus V_n^{\text{ins}}$  with at least one mappable vertex  
198 in  $V' \setminus V'_n$  under  $\phi_n$ . If there are no such vertices ( $S_n = \emptyset$ ), then we simply define  $\phi_{n+1} = \phi_n$ ,  
199  $V_{n+1} = V_n$ ,  $V'_{n+1} = V'_n$ , and set  $V_{n+1}^{\text{ins}} = \emptyset$ . Otherwise, if there are such vertices ( $S_n \neq \emptyset$ ), then  
200 we find a vertex  $v_{n+1} \in S_n$  with a smallest set of mappable vertices  $M'_{n+1} \subseteq V' \setminus V'_n$  under  $\phi_n$ .  
201 We then find all RLMs of  $v_{n+1}$  under  $\phi_n$  and, for each vertex  $v'_m \in M'_{n+1}$ , we find all LMs of  
202  $v_{n+1}$  and  $v'_m$  under  $\phi_n$ . Next, we find if there is a vertex  $v'_{n+1} \in M'_{n+1}$  for which all LMs of  $v_{n+1}$   
203 and  $v'_{n+1}$  are larger than all LMs of  $v_{n+1}$  and  $v'_m \in M'_{n+1} \setminus \{v'_{n+1}\}$ , and larger than all RLMs  
204 of  $v_{n+1}$ . Finally, we distinguish between the case where  $v'_{n+1}$  exists or not. If such a vertex  
205  $v'_{n+1}$  exists, then we define a new cell mapping  $\phi_{n+1} : V_n \cup \{v_{n+1}\} \rightarrow V'_n \cup \{v'_{n+1}\}$  such that  
206  $\phi_{n+1}(v_{n+1}) = v'_{n+1}$  and  $\phi_{n+1}(v) = \phi_n(v) \forall v \in V_n$ , and define a new set of inspected vertices  
207  $V_{n+1}^{\text{ins}} = V_n^{\text{ins}}$ . If there is no such vertex  $v'_{n+1} \in \Gamma_G(V_n) \setminus V_n^{\text{ins}}$ , then we construct an extended  
208 set of inspected vertices  $V_{n+1}^{\text{ins}} = V_n^{\text{ins}} \cup \{v_{n+1}\}$ , and set  $\phi_{n+1} = \phi_n$ ,  $V_{n+1} = V_n$ , and  $V'_{n+1} = V'_n$ .  
209 We then increment  $n$  and return to the start of the iteration. Note that at each iteration the  
210 algorithm proceeds even if there are no non-trivial LMs or RLMs for a given vertex  $v_{n+1}$ .

211 The iteration halts as soon as we encounter  $S_n = \emptyset$  for two consecutive values of  $n$ . We then  
212 define  $\phi_{\text{cell}} = \phi_n$ ,  $V_{\text{cell}} = V_n$  and  $V'_{\text{cell}} = V'_n$ . Figure 3D-E illustrates the cells considered when  
213 searching for the RLMs and LMs of a given vertex.

## 214 **Post-processing**

215 The cell mapping  $\phi_{\text{cell}}$  is intended to correctly track as many cells as possible between consecutive  
216 images. Nevertheless, it is possible that some members of  $V_{\text{cell}}$  may be tracked incorrectly, while  
217 the cell mapping may have excluded some vertices in  $V$  that could have been tracked correctly.  
218 To eliminate tracking errors and track cells that are not included in the conserved MCS, we  
219 construct a *tracking mapping*,  $\psi_{\text{track}}$ , from  $\tilde{V}_{\text{track}} \subseteq V$  to  $\tilde{V}'_{\text{track}} \subseteq V'$ . We call a mapping

220  $\psi : \tilde{V} \subseteq V \rightarrow \tilde{V}' \subseteq V'$  a *tracking mapping* if it is an isomorphism from  $\tilde{V}$  to  $\tilde{V}'$ . In contrast to a  
221 cell mapping, a tracking mapping need not preserve polygon numbers or edges between vertices  
222 of the subgraphs induced by  $\tilde{V}$  and  $\tilde{V}'$ .

223 We begin by defining a first tracking mapping  $\psi_1 = \phi_{\text{cell}}$  from  $\tilde{V}_1 = V_{\text{cell}}$  to  $\tilde{V}'_1 = V'_{\text{cell}}$ . In the  
224 following, we describe how we iteratively refine the tracking mapping by first removing vertices  
225 from the domain that we suspect to correspond to incorrectly tracked cells (figure 2B-C), and  
226 then we add vertices to the domain to track cells that are not members of the MCS (figure 2D).

227 **Removing weakly connected cells** Let  $\psi$  be a tracking mapping from  $\tilde{V} \subseteq V$  to  $\tilde{V}' \subseteq V'$ .  
228 We define  $v \in \tilde{V}$  to be *weakly connected* with respect to  $\psi$  if the set  $\Gamma_G(v) \cap \tilde{V}$  contains  
229 either: exactly one vertex; or exactly two vertices that are not adjacent. We remove any weakly  
230 connected vertices from the tracking mapping since the corresponding cells may have been  
231 tracked incorrectly by the MCS (figure 2). To do this, we first find the set of vertices  $\tilde{S}_n \subseteq \tilde{V}_1$  that  
232 are weakly connected with respect to  $\psi_1$ . Next, we let  $\tilde{V}_2 = \tilde{V}_1 \setminus \tilde{S}_n$ ,  $\tilde{V}'_2 = \tilde{V}'_1 \setminus \{\psi_1(w) : w \in \tilde{S}_n\}$ ,  
233 and define a new tracking mapping  $\psi_2 : \tilde{V}_2 \rightarrow \tilde{V}'_2$  to be the restriction of  $\psi_1$  to  $\tilde{V}_2$ . Note that  
234 this step accounts for the possibility that  $\tilde{S}_n = \emptyset$ ; in this case, we simply have  $\psi_2 = \psi_1$ .

235 **Adding cells that were not tracked by the MCS** We next add cells to the tracking map-  
236 ping. This is necessary, since any cells that have undergone neighbour exchanges between the  
237 consecutive images may have changed their polygon numbers, or their adjacency to each other.  
238 This means that their corresponding vertices cannot be members of the conserved MCS, and so  
239 regions of cell neighbour exchanges will leave gaps of untracked cells in the MCS (figure 2B-C).

240 In the following, we iteratively extend the domain of the tracking mapping to include vertices  
241 that have neighbours within the domain of the tracking mapping. Possible images of a given  
242 vertex can be identified by the aid of the images of the neighbours of the vertex. In this way,  
243 we track as many remaining cells as possible based on their neighbour relationships to cells that  
244 have been tracked by the conserved MCS. The more mapped neighbours that are preserved  
245 between a newly added vertex and its image, the higher our confidence that the corresponding  
246 cells are correctly tracked. For this reason, the algorithm starts by requiring that at least  $n_p = 4$   
247 previously mapped neighbours are preserved for newly added cells. Once no further cell can be  
248 added that fulfils this condition, the algorithm is restarted with requiring  $n_p = 3$ , and finally

249 with  $n_p = 2$ .

250 Formally, we start with a tracking mapping  $\psi_n : \tilde{V}_n \rightarrow \tilde{V}'_n$  (initially with  $n = 2$ ). We  
 251 inspect all vertices in  $V \setminus \tilde{V}_n$  consecutively. At each step, one such vertex  $v$  is considered. Let  
 252  $T_n(v) = \{\psi_n(w) : w \in \Gamma_G(v) \cap \tilde{V}_n\}$  denote the set of images of all adjacent vertices of  $v$  in  
 253 the domain of the current tracking mapping. If  $|T_n(v)| \geq n_p$  (note, that  $n_p = 4$  initially), we  
 254 construct the set of vertices in  $V' \setminus \tilde{V}'_n$  that elements of  $T_n(v)$  share as neighbours,

$$W_n^{(1)}(v) = \bigcup_{v' \in T_n(v)} \Gamma_{G'}(v') \setminus \tilde{V}'_n. \quad (1)$$

255 If  $W_n^{(1)}(v)$  is empty and  $|T_n(v)| \geq n_p + 1$ , then we consider reduced sets of images of the form  
 256  $T_n(v) \setminus \{w'\}$ , where one element  $w'$  is removed from  $T_n(v)$ , and we define the set of all shared  
 257 neighbours of each reduced image set that are not in the image of  $\psi_n$ :

$$W_n^{(2)}(v) = \bigcup_{w' \in T_n(v)} \left( \bigcap_{v' \in T_n(v) \setminus \{w'\}} \Gamma_{G'}(v') \setminus \tilde{V}'_n \right). \quad (2)$$

258 By construction, the set  $W_n^{(2)}(v)$  contains those vertices in  $V' \setminus \tilde{V}'_n$  that are shared neighbours  
 259 of images of neighbours of  $v$ , each excluding one such neighbour. We introduce the condition  
 260  $|T_n(v)| \geq n_p + 1$  above to ensure that the number of preserved neighbours in each reduced image  
 261 set  $T_n(v) \setminus \{w'\}$  is at least  $n_p$ .

262 If (i)  $W_n^{(1)}(v)$  contains exactly one vertex  $v'$ , or if  $W_n^{(1)}(v) = \emptyset$  and  $W_n^{(2)}(v)$  contains exactly  
 263 one vertex  $v'$ , and (ii)  $v'$  has at most two neighbours in  $\tilde{V}'_n$  that are not neighbours of  $v$  in  $\tilde{V}_n$ , then  
 264 we let  $\tilde{V}_{n+1} = \tilde{V}_n \cup \{v\}$ ,  $\tilde{V}'_{n+1} = \tilde{V}'_n \cup \{v'\}$  and define a new tracking mapping  $\psi_{n+1} : \tilde{V}_{n+1} \rightarrow \tilde{V}'_{n+1}$   
 265 to be the extension of  $\psi_n$  for which  $\psi_{n+1}(v) = v'$ . Otherwise, if (i) or (ii) is not satisfied, then  
 266 we leave  $\psi_n : \tilde{V}_n \rightarrow \tilde{V}'_n$  unchanged. Condition (ii) ensures that cell matches that would add a  
 267 large number of neighbours to the tracked cell between  $G$  and  $G'$  are not accepted.

268 Once  $v$  has been inspected, and  $\psi_n$  has been extended if possible, a next vertex in  $V \setminus \tilde{V}_n$  is  
 269 chosen and inspected. When all vertices in  $V \setminus \tilde{V}_n$  have been inspected, the search is restarted,  
 270 and all vertices in  $V \setminus \tilde{V}_n$  are again consecutively inspected. The search is restarted repeatedly  
 271 in this manner to ensure that any cells that have gained mapped neighbours during the post-  
 272 processing step can be inspected for mapping again. We halt our search as soon as  $\psi_n$  is not  
 273 extended between two consecutive restarts. Once the search is halted, we repeat the procedure

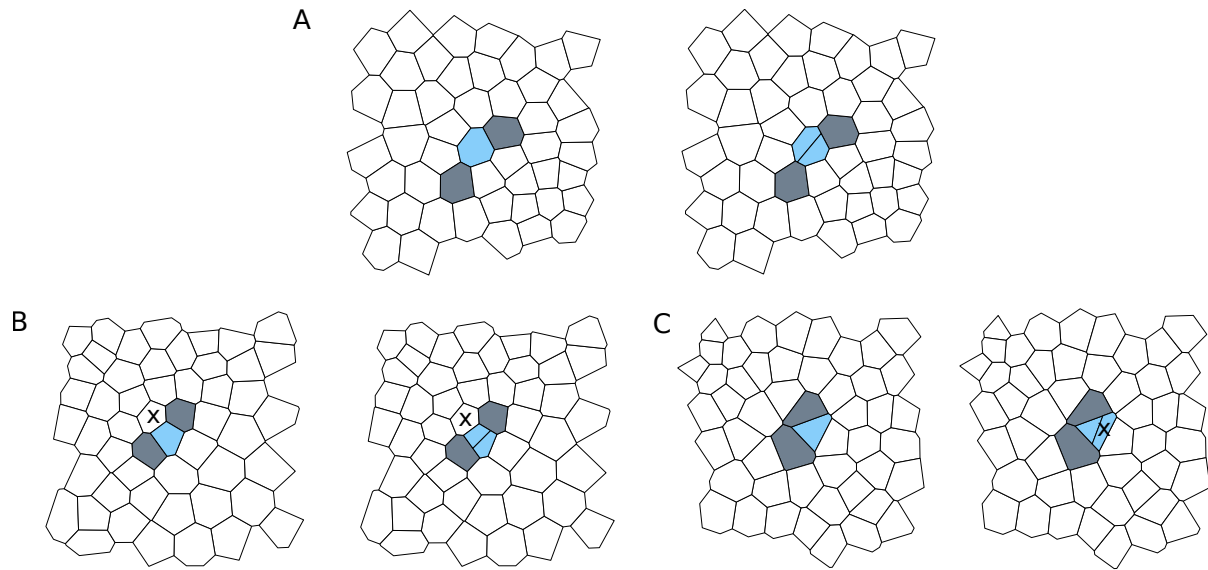

Figure 4: Resolving division events. Dividing cells are coloured blue. (A) Division events are resolved by identifying cells that gain an edge between the time frames (grey cells). The dividing cell and the daughter cells are shared neighbours of the grey cells. (B) When one of the daughter cells is four-sided, two mother cells are possible, the blue marked mother cell, and the cell marked by an ‘x’. (C) When one of the daughter cells is three-sided the mother cell can be mistaken as having gained an edge if it is identified with the daughter cell marked by an ‘x’. Our algorithm correctly resolves division events such as in (A), (B), and (C).

274 with  $n_p = 3$ , and finally with  $n_p = 2$ .

275 **Resolving division events** If a cell divides between consecutive frames, then the tracking  
 276 mapping  $\psi_n$  we have constructed thus far may incorrectly identify the mother cell with one of  
 277 its daughter cells (figure 4). To address this issue, we construct a tracking mapping  $\psi_{\text{track}}$  in  
 278 which incorrectly tracked mother cells are removed. To resolve division events, we first identify  
 279 *boundary vertices* to be those vertices  $v \in V$  whose polygon number and degree differ. This  
 280 corresponds to cells that are at the physical boundary of the sheet, where polygon number  
 281 and network degree do not coincide (figure 3A). We then identify all connected sets of vertices  
 282  $M' \subseteq V' \setminus \tilde{V}'_n$  that satisfy  $\Gamma'_G(M') \subseteq \tilde{V}'_n$  and that contain no boundary vertices of  $V'$ . Each such  
 283 set  $M'$  corresponds to one division event, and in the following we treat each  $M'$  individually.

284 For each  $M'$ , we define  $S_{M,1} = \psi_n^{-1}(\Gamma'_G(M'))$  to be the set of inverse images of the mapped  
 285 neighbours of  $M'$  under  $\psi_n$ . Next, we identify the set  $S_{\text{border}} \subseteq S_{M,1}$  of potential bordering cells  
 286 of the division, i.e. cells that are adjacent to the division, by finding those vertices  $v \in S_{M,1}$

287 that gain an edge under the tracking mapping  $\psi_n$ :

$$S_{\text{border}} = \{v \in S_{M,1} : p_{G'}(\psi_n(v)) = p_G(v) + 1\}. \quad (3)$$

288 We also identify the set  $S_{\text{mother}}$  of potential mother cells by finding any shared neighbours of  
289 potential bordering cells:

$$S_{\text{mother}} = \bigcap_{v \in S_{\text{border}}} \Gamma_G(v). \quad (4)$$

290 Based on the sets  $S_{\text{border}}$  and  $S_{\text{mother}}$  we decide which cells are the mother and daughter cells  
291 of the division event, distinguishing between the following cases:

- 292 (i) If  $S_{\text{mother}}$  contains exactly one vertex, then this is identified as the mother cell of the  
293 division, and  $M'$  must contain exactly two vertices, which are identified as the daughter  
294 cells. In this case, neither the mother nor daughter cells are three- or four-sided.
- 295 (ii) If  $S_{\text{mother}} = \emptyset$ , then one of the daughter cells must be three-sided (figure 4c). In this case,  
296 a geometry-inferred selection of mother and daughter cells is required. To this end, we  
297 define a set of potential daughter cells

$$S'_{\text{daughter}} = \psi_n(S_{\text{border}}) \cup \left( \bigcap_{v' \in \psi_n(S_{\text{border}})} \Gamma_{G'}(v') \right). \quad (5)$$

298 that contains the images of the potential bordering cells and all shared neighbours of  
299 these images in  $V'$ . Next, we find a definite daughter cell as an element  $v' \in S_{\text{daughter}}$   
300 that is three-sided ( $p_{G'}(v) = 3$ ). The geometry-inferred selection of the second daughter  
301 cell proceeds as follows. For each  $w' \in S'_{\text{daughter}} \setminus \{v'\}$ , we construct the *geometrically*  
302 *merged cell* of  $v'$  and  $w'$  by removing the edge between the polygons that corresponds to  
303  $v'$  and  $w'$  in the segmentation of the microscopy video frame from which the graph  $G'$   
304 was generated, as well as the cell junctions where three or more cells meet at the end  
305 of this edge. We then calculate the distance of the centroid of the geometrically merged  
306 cell to the centroid of the cell associated with vertex  $\psi_n^{-1}(w')$ . The vertex  $w'$  for which  
307 this distance is minimal is identified as the second daughter cell, and the mother cell is  
308 identified as its inverse image under  $\psi_n$ .

- 309 (iii) If  $S_{\text{mother}}$  contains more than one vertex, then we define a set of potential daughter cells

310 as any shared neighbours of images of the potential bordering cells

$$S'_{\text{daughter}} = \bigcap_{v' \in \psi_n(S_{\text{border}})} \Gamma_{G'}(v'). \quad (6)$$

311 If  $S'_{\text{daughter}}$  contains exactly four vertices, then the mother cell and both daughter cells  
 312 are four-sided, and the mother cell can be identified as the single vertex in the set  $S_{M,2}$ ,  
 313 which we define as the set of cells which are shared neighbours of all cells in  $S_{M,1}$  (the  
 314 inverse images of neighbours of the division), and which are not in the domain of  $\psi_n$ , i.e.

$$S_{M,2} = \bigcap_{v \in S_{M,1}} \Gamma_G(v) \setminus \tilde{V}_n \quad (7)$$

315 The daughter cells correspond to the only two vertices in  $M'$ .

316 If  $S'_{\text{daughter}}$  contains exactly three vertices, then one of the daughter cells is four-sided,  
 317 and we identify this cell as the definite daughter cell of the division  $v'$ , i.e. we identify  
 318  $v' \in S'_{\text{daughter}} : p_{G'}(v') = 4$ . In this case, geometry-inferred selection of the second daughter  
 319 cell is required, and we achieve this in a similar way to that described for three-sided  
 320 daughter cells above. For each cell  $w' \in S'_{\text{daughter}} \setminus \{v'\}$ , we construct the merged cell of  
 321  $v'$  and  $w'$ , and calculate the distance of its centroid to the centroid of  $\psi_n^{-1}(w')$ . The cell  
 322  $w' \in S'_{\text{daughter}} \setminus \{v'\}$  for which this distance is smallest is the second daughter cell. Since in  
 323 this case  $S_{\text{mother}}$  contains more than one cell,  $S'_{\text{daughter}}$  must contain at least three cells<sup>8</sup>.

324 Once each set  $M'$  has been inspected and the associated division event has been resolved  
 325 by identifying the mother and daughter cells, we construct a tracking mapping in which any  
 326 incorrectly tracked mother cells are removed. To this end, we define the set of all mother cells  
 327 for which geometry-inferred selection has been used as  $S_{\text{geo}}$ , and we construct a final tracking  
 328 mapping  $\psi_{\text{track}} : \tilde{V}_n \setminus S_{\text{geo}} \rightarrow \tilde{V}'_n \setminus \psi_n(S_{\text{geo}})$  such that  $\psi_{\text{track}}(v) = \psi_n(v) \forall v \in \tilde{V}_n \setminus \psi_n(S_{\text{geo}})$ .

329 In general, the division resolution step may incorrectly track cells in cases where there is  
 330 a cell neighbour exchange next to the division, or if there are two adjacent divisions between  
 331 frames. For example, if each of the bordering cells, i.e. the cells adjacent to the division, were to  
 332 undergo a neighbour exchange in which they lose an edge between images, then our algorithm

<sup>8</sup>If  $S'_{\text{daughter}}$  contains more than four cells, then our algorithm fails; however, this was never encountered in our test cases.



333 would fail to correctly resolve the division event.

334 **Resolving remaining events** At this stage, the tracking algorithm for the two consecutive  
335 time frames is completed, and it is straightforward to identify cell neighbour exchanges by  
336 finding any cells that have changed their polygon number from one frame to the next. Cell  
337 removal events correspond to any vertices  $v \in V$  that are not in the domain of  $\psi_{\text{track}}$ , and for  
338 which  $\Gamma_G(v) \subseteq V_{\text{track}}$ , and that do not correspond to mother cells of a division event.

### 339 Computational implementation

340 We use Krissinel’s MCS finding algorithm [36] to find all RLMs and LMs in the above steps. This  
341 algorithm will always halt eventually. In particular, since the domains on which the RLMs and  
342 LMs are calculated only contain extended neighbourhoods of individual cells, the MCS finding  
343 does not pose computational barriers. We adapt the procedure for MCS finding proposed in [36]  
344 in two ways: (i) whenever a next vertex is considered for mapping, we pick a vertex that is  
345 adjacent to already mapped cells, hence the adapted algorithm only finds connected subgraphs;  
346 (ii) since the RLMs and LMs are small, we do not implement subgraph-size dependent conditions  
347 to interrupt the search early.

348 When finding the initial mapping, for any two possible matches LMs are first calculated  
349 by considering nearest neighbours only rather than extended neighbourhoods. Once the neigh-  
350 bourhoods<sup>9</sup> of two matching vertices are found to be isomorphic, the extended neighbourhood  
351 is considered. This step reduces the time that is needed to find the initial match.

352 In the computational implementation of the tracking algorithm we use a further vertex-label  
353  $c_G : V \rightarrow \mathbb{N}$ , which we call the *cell identifier*. In practice, integer identifiers for a given vertex  $v$   
354 arise naturally in the segmentation step. Cell identifiers allow us to easily identify vertices and  
355 relate them to a cell in a given image independent of how they are stored in the graph structure.

356 The code used in this article is publicly available under the 3-clause BSD license as the  
357 MCSTracker project (<https://github.com/kursawe/MCSTracker>). The project is implemented  
358 in pure-Python, employs unit-testing [39] and is fully documented. Graphs in our code are rep-  
359 resented using the NetworkX package in Python [40].

---

<sup>9</sup>The set of adjacent vertices,  $\Gamma_G(v) = \{w \in V : \{v, w\} \in E\}$  is called the *neighbourhood* of  $v$ , so the degree of  $v$  is  $|\Gamma_G(v)|$ . We define the neighbourhood of a subset  $V' \subseteq V$  to be  $\Gamma_G(V') = \{w \in V \setminus V' : \exists v \in V' \text{ with } d(w, v) = 1\}$ .

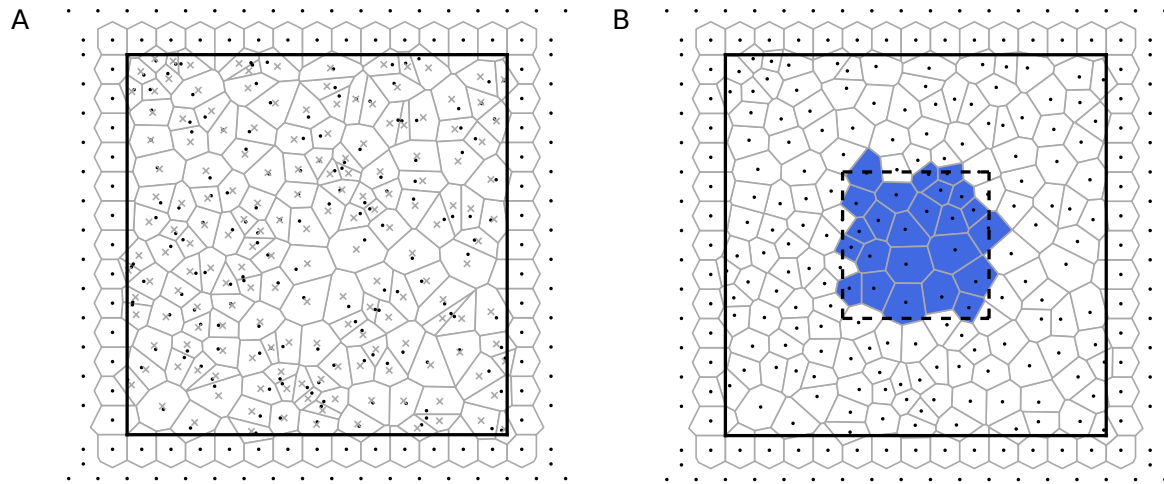

Figure 5: Generation of *in silico* data. (A) Random seeds (black dots) are placed inside a domain  $\Omega$ , the border of which is shown using a black line. Additionally, evenly spaced seeds are placed outside  $\Omega$ . The Voronoi tessellation of all seeds is shown in grey, excluding Voronoi regions corresponding to the outermost row of seeds, since these are large or unbounded. The centroids of the Voronoi regions differ from the seeds, and are shown as grey crosses. (B) The centroids of the Voronoi regions in (A) are used as seeds for a new Voronoi tessellation, for which evenly spaced seeds are again added outside the domain  $\Omega$ . Voronoi regions whose centroids lie within a window (dashed black line) at the centre of the domain are collected to form the *in silico* tissue (blue). In this figure, one Lloyd's relaxation step ( $n_L = 1$ ) is shown. Throughout this study, we generate *in silico* tissues using  $n_L = 4$  Lloyd's relaxation steps.

### 360 Generation of *in silico* data sets

361 To test the algorithm, we generate *in silico* data sets that include examples of cell divisions,  
362 removals and neighbour exchanges, as well as tissue movement. These data sets are generated  
363 using Voronoi tessellations modified using Lloyd's relaxation, which resemble cell packings in a  
364 variety of epithelial tissues [33, 41].

365 To generate polygonal patterns of size  $m \times n$ , where  $m$  and  $n$  are natural numbers,  $(m +$   
366  $g) \times (n + g)$  Voronoi seeds are uniformly random distributed in a 2D domain  $\Omega$  of width  $m + g$   
367 and height  $n + g$  (figure 5A). Here,  $g$  is the size of a boundary region that is introduced to  
368 reduce the impact of the Voronoi boundary on the patterns. The domain  $\Omega$  is surrounded by  
369 two rows of evenly spaced additional seeds on each side. The inner row has a distance of 0.5  
370 to  $\Omega$ , and the seed-spacing is 1.0. The outer row has a distance of 1.5 to  $\Omega$ , and the seeds are  
371 shifted parallel to the first row by a distance of 0.5. The Voronoi tessellation of all these seeds  
372 is then constructed.

373 In each Lloyd's relaxation step, the polygons (or infinitely large areas) corresponding to the

374 regularly spaced seeds outside  $\Omega$  are removed from the tessellation. Next, the centroid of each  
375 remaining polygon is calculated and registered as a new seed. Further seeds are added that  
376 again correspond to two rows of evenly spaced seeds outside  $\Omega$ . A new Voronoi tessellation  
377 is then constructed (figure 5B). This procedure is repeated for  $L$  relaxation steps, after which  
378 all generated polygons are discarded except those whose centroid lies within an area occupying  
379  $n \times m$  area units in the centre of  $\Omega$  (figure 5B).

380 The polygonal tessellations have approximately  $m \times n$  polygons of average area 1.0. During  
381 the generation of the tessellations, evenly spaced seeds outside  $\Omega$  are added to prevent the  
382 occurrence of infinitely large polygons inside  $\Omega$ . The boundary of size  $g$  is added in between the  
383 generated tessellation and the evenly spaced seeds in order to reduce the effect of the evenly  
384 spaced boundary seeds on the tessellation. Throughout this study, we use  $g = 8$  and  $n_L = 4$ ,  
385 resulting in cell packings similar to those observed in the *Drosophila* wing imaginal disc [33].  
386 We provide further details of how tissue rearrangements are implemented in the Results section.

## 387 **Experimental methods**

388 Live-imaging of cell proliferation was performed in stage-eleven *Drosophila* embryos expressing a  
389 tagged version of DE-Cadherin (DE-Cadherin::GFP) using a spinning disc confocal microscope,  
390 as described in [42]. For the embryo setup, a modified version of the standard live-imaging  
391 protocol was used [43].

392 **Data segmentation** Microscopy images were segmented manually using SeedWaterSegmen-  
393 ter [10]. Each segmentation was saved as a 16-bit grayscale image where pixels belonging to  
394 different cells have different integer values. Polygonal tessellations for the tracking algorithm  
395 were generated from the segmented image in two steps. First, all junctions between three or  
396 more cells were identified as points where pixels of three or more different cells meet, and second,  
397 vertices were assigned to cells. Finally, edges shorter than two pixels (0.5  $\mu\text{m}$ ) were removed  
398 and replaced by a single vertex at the midpoint of the edge.

### 399 3 Results

400 ***In silico* testing of the algorithm.** To assess the performance of the algorithm, we begin  
401 by applying it to *in silico* data sets that include cell neighbour exchanges, tissue movement, cell  
402 removal and cell division, respectively. In each case, we compare the outcome of the tracking  
403 algorithm to the ground truth.

404 We begin by assessing the ability of the algorithm to resolve permutations in otherwise  
405 identical tissues (figure 6A). In this test, a random tessellation of size nine by nine cells is created  
406 as described in the Methods section, and integer identifiers  $c_i$  are assigned to each cell. Next,  
407 an identical copy of the tissue is created in which the integer identifiers are randomly shuffled.  
408 A ground truth mapping from the first to the second integer identifiers is generated. Next,  
409 the algorithm is applied. Upon conducting 100 such tests, all identified cell-to-cell mappings  
410 are matched correctly, as compared to the ground truth. In rare examples, isolated cells at  
411 the boundary of the tissue are not tracked. In these examples, either a single cell has only  
412 one adjacent cell in the tissue, or two cells of identical polygon number are adjacent and share  
413 exactly one neighbour. Neither the MCS detection algorithm, nor the post-processing algorithm  
414 are able to resolve such mappings, which involve fewer than four cells in each dataset (fewer  
415 than five percent of the tissue).

416 We design four further tests of tissue rearrangements (figure 6B-E). The first test comprises  
417 tissue movements between images (figure 6B). In this test, a tissue of size fifteen by eight cells is  
418 generated as described in the Methods section. Two smaller tissues of width seven are cut out of  
419 this tissue, which each cover the full height of the tissue, and which are horizontally translated  
420 relative to each other by a distance of two cell lengths. The position of each three-cell junction  
421 in both tissues is shifted such that the  $x$ -coordinate of the left-most junction in each tissue is 0.

422 The second test (figure 6C) generates cell neighbour exchanges, also called T1 transitions  
423 [44, 45]. In our implementation of T1 transitions, an edge shared by two cells is replaced by a  
424 new perpendicular edge (of length  $l_{T1} = 0.2$  units) such that the local cell connectivity changes  
425 (figure 2B). We create two identical copies of a tissue of size nine by nine cells. In the second  
426 copy, a T1 transition is performed on an edge in centre of the tissue.

427 The third test involves cell removal (figure 6D). In this test, we first generate two identical  
428 copies of a tissue of size nine by nine cells. In the second copy, we replace the central cell by a

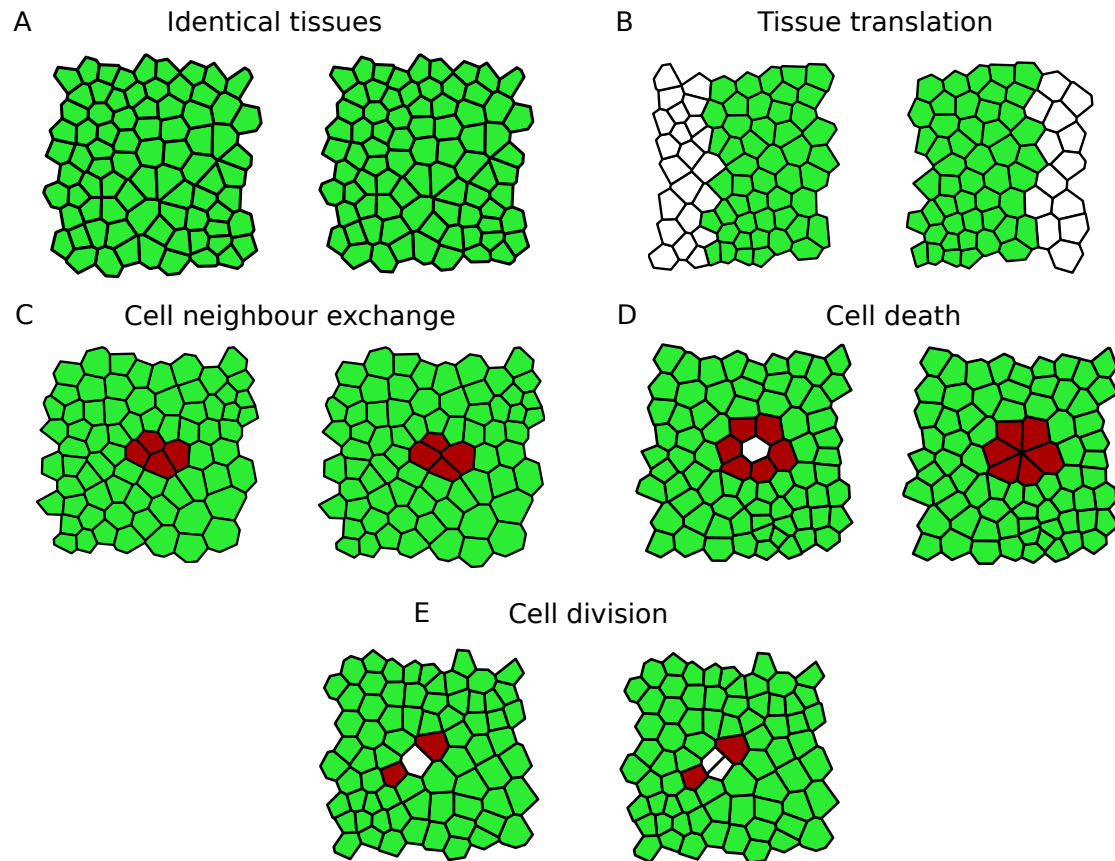

Figure 6: Examples of *in silico* test cases. In each image, cells identified by the MCS algorithm are highlighted in green (light), whereas cells that have been filled in by the post-processing steps are highlighted in red (dark). The algorithm tracks cells between identical tissues (A), in tissues undergoing translation (B), cell neighbour exchange (T1 swap) (C), cell removal (D) and cell division (E).

429 vertex shared by its neighbouring cells. This rearrangement is similar to so-called T2 transitions  
430 in the foams literature [44]. The final test involves cell divisions (figure 6E). Here, we once again  
431 create two identical copies of size nine by nine cells. In the second copy, a cell in the centre of  
432 the tissue is divided by introducing a straight line in a random direction through centroid of  
433 that cell.

434 For all tests generated in this way, integer cell identifiers in the second tissue are randomly  
435 shuffled, and a ground truth is generated. We run 100 realisations of each test case, and compare  
436 the tracking outcome to the ground truth. In all cases cells are tracked correctly, with at most  
437 three unmatched cells at the boundary of the sheet.

438 In figure 6, all cells identified after the cleaning step, in which weakly connected cells are re-  
439 moved from the MCS, are coloured green, whereas cells that are identified by the post-processing

440 algorithm are coloured red. Note that the exact number of cells that are identified by the post-  
441 processing algorithm varies between individual realisations of the tests. In many cases, the cells  
442 identified by the post-processing algorithm include cells that are adjacent to the cells that are  
443 undergoing division, removal or neighbour exchange.

444 We next analyse the extent to which the success of our tracking algorithm depends on the  
445 number of Lloyd's relaxation steps,  $n_L$ , used to generate the *in silico* data sets. To investigate  
446 this we iteratively increase  $n_L$ , and so generate tissues with increasingly homogeneous graph  
447 structures, and repeat all tests. We find that the algorithm successfully passes all tests for all  
448 values of  $n_L$  from 4 up to 14.

449 **Application of the algorithm to *in vivo* data** Figure 7 shows three sample segmented  
450 images of the lateral epidermis of a stage-eleven *Drosophila* embryo, taken five minutes apart,  
451 and to which we apply the algorithm. These images comprise 271, 263 and 263 cells, respectively.  
452 Between the first and the second images, 247 cells are tracked, whereas 245 cells are tracked  
453 between the second and third images. The number of cells that are tracked across all three  
454 images is 234. The centroids of cells of previous images are plotted on top of the tracking,  
455 showing that the tracking algorithm successfully tracks cells in situations where it is difficult to  
456 match cells between images based on the centroid positions alone. Cells that include only their  
457 corresponding centroid from the previous image are coloured in green, whereas cells that do not  
458 include their corresponding centroid from the previous image, and cells that include multiple  
459 centroids from the previous image, are coloured in purple.

460 On average, cell centroids move 0.75 cell lengths between the first and second images, with a  
461 maximal displacement of 1.17 cell lengths. Between the first and second images 36 cells undergo  
462 a net gain in edges, whereas 20 cells have net loss of edges. In total, four cell deaths and no cell  
463 divisions are observed across all three data images, and none of the cells are tracked incorrectly.

464 **Calculation times** To analyse the scaling of the calculation times with tissue size we repeat  
465 the permutation test with tissues of square dimension of varying size on a desktop computer  
466 with an Intel i5-6500T CPU (2.5GHz) and 8GB R. We find that the calculation times scale  
467 subquadratically with cell number (figure 8).

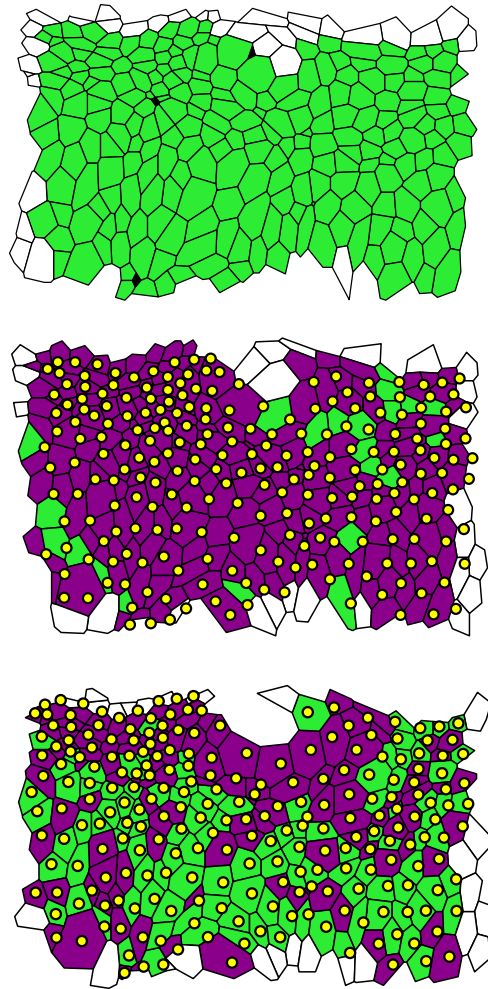

Figure 7: Three segmented data frames. Cells that are tracked across all frames are coloured green or purple, and cells that leave or enter the tissue at the boundary are white. Dying cells are black. The centroids of tracked cells of the respective previous frames are included as yellow dots, and cells that contain only their centroid from the previous frame are coloured green, whereas cells that do not contain their centroid from the previous frame, and cells that contain multiple centroids, are coloured purple. Together, the centroids and the colouring illustrate that it is challenging to track cells between the data frames using solely centroid positions.

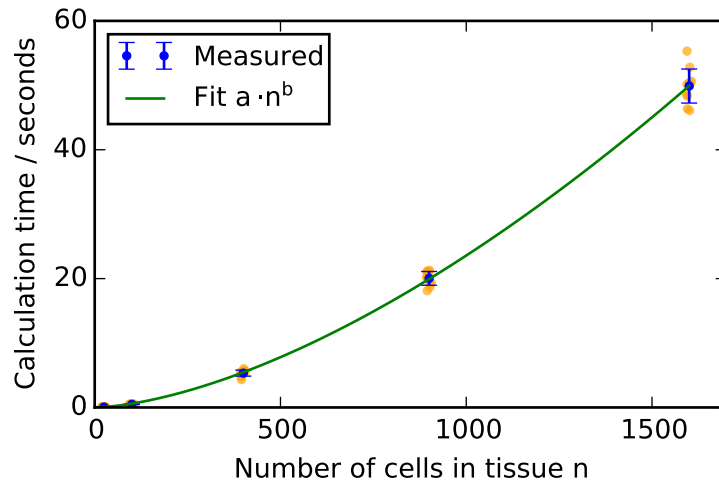

Figure 8: Scaling of the calculation times with tissue size. Virtual tissues of square dimension of varying sizes were generated and the calculation times of the algorithm under the permutation test in figure 6A recorded. Orange dots represent calculation times for individual realisations of the test and error bars denote the standard deviation. The exponent  $b$  of the polynomial fit is 1.6. The calculation times were measured on a desktop computer with an Intel i5-6500T CPU (2.5GHz) and 8GB R.

468 The calculation times for the experimental images analysed in figure 7 vary more widely  
469 than for the *in silico* data sets. For the tracking between the first and second frames in this  
470 figure, the algorithm required 96 seconds to run, whereas between the second and the third  
471 frames the algorithm required 15 seconds. This difference appears to arise from differences in  
472 the time required to find the first correct mapping. In the first example 154 cells were searched  
473 before the first correct mapping was found, whereas in the second example only 12 cells were  
474 searched. This means that the number of cells considered when finding the initial mappings  
475 depends on the graph structure of the analysed frames and impacts on the calculation time of  
476 the algorithm.

477 **Algorithm performance on rearranging tissues** To assess the performance of the algo-  
478 rithm on rearranging tissues, we applied the algorithm to *in silico* data sets with increasing  
479 numbers of cell rearrangements (figure 9). The number of correctly tracked cells decreases as  
480 the number cell rearrangements increases. However, the number of incorrectly tracked cells  
481 remains low even for large numbers of cell rearrangements.



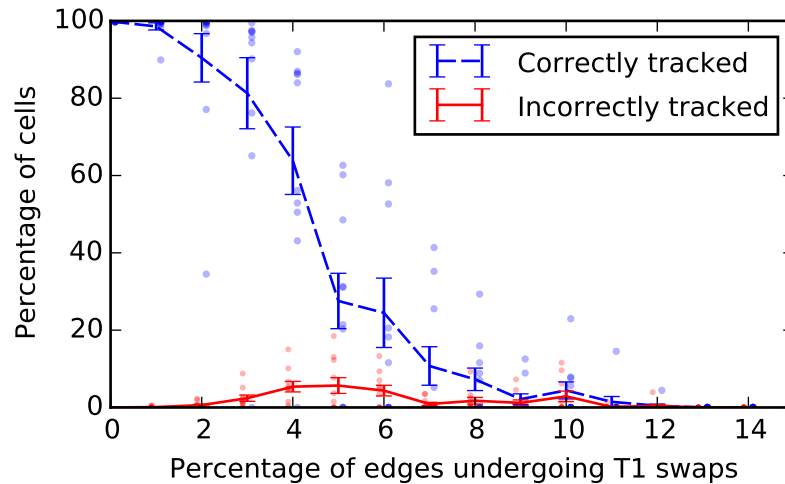

Figure 9: Success rate of the algorithm on *in silico* tissues with increasing amounts of cell rearrangements. Virtual tissues spanning 20 cell lengths in each dimension are generated, and T1 swaps are applied to an increasing proportion of the inner edges of the tissue. For each ratio of T1 swaps, 10 repetitions of the test are run, and the ratio of correctly and incorrectly tracked cells in the tissue is recorded. The dashed blue and solid red lines correspond to mean values of correctly and incorrectly tracked cells, respectively. Error bars denote the standard deviation of the mean, and results of individual runs of the test are represented by dots.

482 The number of untracked cells increases rapidly as the percentage of edge rearrangements,  
483 i.e. the percentage of inner edges in the tissue that are swapped between successive images,  
484 increases from five to ten percent. Note that the number of cells involved in these cell rear-  
485 rangements is larger than five to ten percent, since an individual T1 transition changes the  
486 cell neighbour relations of four different cells, and each cell shares multiple inner edges. For  
487 example, rearranging five percent of the inner edges of the tissue affects roughly 40 percent  
488 of the cells in the tissue, whereas rearranging ten percent of the tissue edges affects up to 70  
489 percent of the cells. The number of (correctly or incorrectly) tracked cells drops to zero if the  
490 tissue rearranges so much that the extended neighbourhood of each cell rearranges. In this case  
491 a first match cannot be found to initialise the MCS construction algorithm.

## 492 4 Discussion

493 Cell tracking in epithelial sheets has the potential to generate a vast amount of quantitative  
494 data to inform our understanding of the contributions of different cellular processes to tissue  
495 morphogenesis. However, cell tracking is notoriously difficult, especially for the complex mor-

496 phogenetic processes that occur as embryogenesis proceeds. Here, we present an algorithm  
497 based on MCS detection for the tracking of cells in segmented images of epithelial sheets. Our  
498 algorithm successfully tracks cells in *in vivo* images of the *Drosophila* embryonic epidermis, as  
499 well as in randomly generated *in silico* data sets, without the need for the adjustment of tissue  
500 specific parameters, such as weights for individual terms in a global minimisation scheme [14].  
501 The use of *in silico* data to test our algorithm allows us to analyse the performance of our  
502 algorithm for a large range of experimentally observed cell rearrangements and tessellations.

503 Our algorithm is able to track cells that undergo significant movement and neighbour ex-  
504 changes between frames. For example, we can correctly track cells in tissues where more than  
505 40 percent of the cells rearrange between successive movie frames (figure 9). In addition, even  
506 comparably large gaps in the initial MCS can be filled in during the post-processing step (figures  
507 2 and 7). For example, in the first tracking step in figure 1, only 182 of the 246 tracked cells  
508 were identified by the MCS algorithm, and it was possible to track the 64 remaining cells during  
509 the post-processing step. For comparison, Heller et al [13] report 15 cell rearrangements per  
510 1000 cells per hour at an imaging interval of six minutes for their time-laps microscopy data of  
511 *Drosophila* wing imaginal discs. In addition, the experimental data shown in figures 2 and 7,  
512 as well as our *in silico* cell removal data sets, contain multicellular rosettes, hence rosettes do  
513 not pose a challenge to our algorithm.

514 Our algorithm is able to correctly track cells in all considered test cases. However, on rare  
515 occasions a few cells at the tissue boundary cannot be tracked. It may be possible to adapt the  
516 algorithm to track these cells, if this is considered necessary for the application at hand. In the  
517 current version of the algorithm, two connections to already tracked cells that are preserved  
518 between two time frames are a condition to add a cell-to-cell mapping in the post-processing  
519 algorithm. Further analysis of cases where this condition is not fulfilled may reveal ways to  
520 relax it.

521 When generating *in silico* data to test the algorithm, we used Voronoi tessellations in com-  
522 bination with Lloyd's relaxation to generate data that resembles tissues in the *Drosophila* wing  
523 imaginal disc [33]. We expect the algorithm to perform less well on tissues whose network  
524 structure is near homogeneous. For example, in an epithelial sheet where cells are arranged  
525 in a hexagonal fashion, such as the early *Drosophila* embryonic epidermis [46] or the late pu-

526 pal *Drosophila* wing [47], the local adjacency network of each cell is identical, and hence a  
527 network-based tracking algorithm may not be able to distinguish cells. When generating *in*  
528 *silico* tissues, we use four Lloyd's relaxation steps after Voronoi tessellation. With each Lloyd's  
529 relaxation step, the homogeneity of the tissue increases. We were able to successfully repeat  
530 all *in silico* tests on virtual tissues that were generated using up to  $n_L = 14$  Lloyd's relaxation  
531 steps. Hence, we expect the algorithm to be suitable for tissues that can be well described with  
532 14 or fewer Lloyd's relaxation steps, such as the chick neural tube embryonic epithelium, or the  
533 *Drosophila* eye disc [33].

534 The algorithm relies on being able to generate polygonal tessellations from segmented video  
535 microscopy data. In particular, all *in silico* tests we conducted consider tissues where each cell  
536 has at least three neighbours. Conceptually, it would be possible to apply the algorithm to  
537 tissues in which individual cells may have only two neighbours, although such examples have  
538 not been included in our analysis.

539 In microscopy videos including division events we expect the algorithm to perform well in  
540 tissues in which no adjacent divisions occur between successive movie frames, and in which  
541 cells adjacent to the dividing cell do not undergo rearrangements before the next frame is  
542 captured. Our algorithm is designed to identify mother and daughter cells of a division event  
543 by establishing which are the bordering cells that gain an edge during the division event. In  
544 the case of two adjacent divisions, and if cells adjacent to a division event gain edges due to  
545 cell rearrangements, the dividing cell cannot be correctly identified. An example of a typical  
546 tracking error for two adjacent divisions is shown in figure 10. In cases where the division  
547 resolution step fails, our Python implementation returns all tracked cells of the post-processing  
548 step, and gives a warning that the division has not been resolved. In these cases, manual  
549 correction methods could be used for incorrectly tracked cells in the vicinity of division events.

550 The parameters of the algorithm are chosen to maximise the robustness of the algorithm  
551 and avoid the necessity to adjust the parameters to individual applications. For example, the  
552 cutoff length,  $d_{\max}$ , that determines the distance below which two cells in consecutive movie  
553 frames are considered mappable to each other was chosen at 10 times the average cell length  
554 in the tissue, which is significantly larger than the movement that is to be expected between  
555 consecutive frames of a live-imaging microscopy video. However, parameter adjustments may

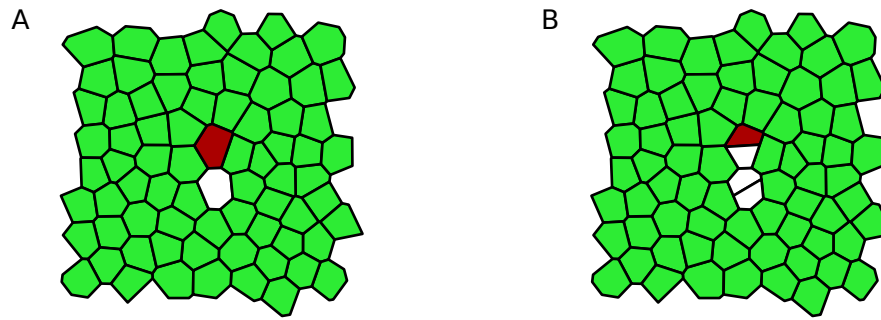

Figure 10: Tracking errors can occur if adjacent cells divide. Here, all green (light) cells are tracked correctly. One of the mother cells (red/dark) of the division events has been incorrectly associated with one of the daughter cells of the division.

556 be possible for individual applications in order to decrease the algorithm calculation times. For  
557 example, the size of the extended neighbourhood considered in the initial step or the iterative  
558 extension could be reduced to include only nearest neighbours instead of nearest neighbours and  
559 second nearest neighbours in case the tissue is sufficiently heterogeneous. Similarly, one might  
560 decrease the cutoff length,  $d_{\max}$ , for possible cell pairings if the cell positions are not expected  
561 to vary significantly between time frames. When filling in any gaps in the MCS (figure 2C-D),  
562 requiring that  $n_p = 4$  neighbours are preserved between consecutive frames for newly added  
563 cells seems to be a sufficiently large number in practice. However, it is possible to start the  
564 post-processing requiring a higher number of previously mapped neighbours for the tracking.

565 Adjustments may be possible to extend the applicability of the algorithm to a wider range of  
566 tissues. For example, instead of automatic detection of the initial seeds for the MCS detection  
567 algorithm, a small set of seeds could be manually supplied to guide the tracking. This should  
568 improve the performance of the algorithm on homogeneous tissues. A further option to improve  
569 tracking of cells in homogeneous tissues is to make adaptations that ensure that the cyclic order  
570 of neighbours of each cell is preserved under the mapping. In such cases, irregular boundaries  
571 may also help to aid the initial seeding. Finally, in cases where the algorithm is not able to  
572 track all cells due to a larger number of cell neighbour exchanges than in the tissues considered  
573 here, it may be possible to extend the current algorithm by removing the assumption that the  
574 MCS is connected, and using a set of non-adjacent cells as initial seeds.

575 In the presented work, we have deliberately kept the geometrical input to the algorithm  
576 to a minimum. Cases where geometric data are taken into account comprise division events  
577 where one of the daughter cells is four- or three- sided, since in these cases we are not able to

578 make a decision on which cell is the second daughter cell based on network adjacency alone. If  
579 future applications reveal cases where the algorithm performs poorly due to a large number of  
580 cell neighbour exchanges or high degree of tissue homogeneity, it may be possible to construct  
581 algorithms that combine information on the network topology with data on cell shapes, cell  
582 positions and cell movements to improve performance. For example, information on network  
583 topology could be integrated into previous algorithms which minimise differences between ge-  
584 ometric properties of cells, such as cell size and location [24], with information about network  
585 connectivity.

586 In cell tracking applications, the scaling of the algorithm with tissue size is crucial. Potential  
587 applications range from systems of 30 cells (*Drosophila* embryonic epidermal P compartments  
588 [9]), to 10,000 cells (*Drosophila* imaginal wing disc [31]). Calculation times in the presented  
589 algorithm scale subquadratically with cell number, making it suitable for applications of varying  
590 sizes. For example, extrapolating the data in figure 8, a tissue of 10,000 cells could be tracked  
591 across two frames within 20 minutes. The scaling of the algorithm is polynomial despite the  
592 fact that it is based on MCS detection, which is known to be an NP-hard problem in the general  
593 case, i.e. the calculation times scale exponentially with the problem size. MCS detection has a  
594 wide range of research applications, including protein interaction networks [48, 49] and finding  
595 the binding sites of chemical structures [38]. Our approach of reducing the MCS search to  
596 a local, close to quadratically scaling search may have applications in other areas where the  
597 networks are inherently planar.

598 Our algorithm is designed to track cells in segmented microscopy videos of epithelial sheets  
599 in two dimensions. However, it may be possible to apply the algorithm to datasets of epithelial  
600 sheets that are embedded in a three-dimensional environment, such as the *Drosophila* imaginal  
601 wing disc [4], or the *Drosophila* embryonic epidermis [6, 9], including tissues that can be mapped  
602 onto a cylinder or ellipsoid, such as the mouse visceral endoderm [50].

603 A large number of cell tracking algorithms have been developed for varying applications [10–  
604 27]. Further efforts are required to compare these algorithms with our own, and to identify the  
605 algorithm best suited for an individual data set. In the cell tracking challenge [51] the authors  
606 provide microscopy videos from a variety of *in vitro* cell cultures, including, for example, mouse  
607 embryonic stem cells and human squamous lung carcinoma cells, together with ground-truth

608 segmentation and tracking data as benchmarks for cell tracking and segmentation algorithms.  
609 However, many of the published algorithms above have not yet been applied to the challenge,  
610 and benchmark datasets for epithelial sheets are currently not available. In [52] *in silico* data  
611 sets are used as benchmarking data sets for particle tracking algorithms.

612 The proposed algorithm provides a tracking solution specialised for cell-tracking in epithelial  
613 sheets that attempts to maximise the information that can be gained from the packing that is  
614 typical to epithelial tissues. It may, however, be possible to extend this algorithm to applica-  
615 tions of two-dimensional cell tracking where cells are not physically connected by constructing  
616 adjacency networks from Voronoi tessellations that use the cell locations as seeds. We hope  
617 that, as segmentation tools are developed further, the combination of our algorithm with these  
618 tools will lead to further insights into cellular behaviour in epithelial tissues.

## 619 Acknowledgements

620 J.K. acknowledges funding from the Engineering and Physical Sciences Research Council through  
621 a studentship. J.Z. acknowledges funding support from the National Science Foundation (awards  
622 CBET-1553826 and CBET- 1403887). The authors thank Cody Narciso for sharing the mi-  
623 croscopy data.

## 624 References

- 625 [1] Stephens, D. J. and Allan, V. J. Light microscopy techniques for live cell imaging. *Science*,  
626 300(5616):82–86, 2003. 10.1126/science.1082160.
- 627 [2] Pantazis, P. and Supatto, W. Advances in whole-embryo imaging: a quantitative transition  
628 is underway. *Nat. Rev. Mol. Cell. Biol.*, 15(5):327–339, 2014. 10.1038/nrm3786.
- 629 [3] Truong, T. V. and Supatto, W. Toward high-content/high-throughput imaging and analysis  
630 of embryonic morphogenesis. *Genesis*, 49(7):555–569, 2011. 10.1002/dvg.20760.
- 631 [4] Mao, Y., Tournier, A. L., Bates, P. A., Gale, J. E., Tapon, N., and Thompson, B. J. Planar  
632 polarization of the atypical myosin dachs orients cell divisions in *Drosophila*. *Genes Dev.*,  
633 25(2):131–136, 2011. 10.1101/gad.610511.

- 634 [5] Gibson, M. C., Patel, A. B., Nagpal, R., and Perrimon, N. The emergence of geometric  
635 order in proliferating metazoan epithelia. *Nature*, 442(7106):1038–1041, 2006. 10.1038/na-  
636 ture05014.
- 637 [6] Rauzi, M., Verant, P., Lecuit, T., and Lenne, P.-F. Nature and anisotropy of cortical  
638 forces orienting *Drosophila* tissue morphogenesis. *Nat. Cell Biol.*, 10(12):1401–1410, 2008.  
639 10.1038/ncb1798.
- 640 [7] Collinet, C., Rauzi, M., Lenne, P.-F., and Lecuit, T. Local and tissue-scale forces drive  
641 oriented junction growth during tissue extension. *Nat. Cell Biol.*, 17(10):1247–1258, 2015.  
642 10.1038/ncb3226.
- 643 [8] Ritsma, L., Ellenbroek, S. I. J., Zomer, A., Snippert, H. J., de Sauvage, F. J., Simons, B. D.,  
644 Clevers, H., and van Rheenen, J. Intestinal crypt homeostasis revealed at single-stem-cell  
645 level by *in vivo* live imaging. *Nature*, 507(7492):362–365, 2014. 10.1038/nature12972.
- 646 [9] Parker, J. Control of compartment size by an EGF ligand from neighboring cells. *Curr.*  
647 *Biol.*, 16(20):2058–2065, 2006. 10.1016/j.cub.2006.08.092.
- 648 [10] Mashburn, D. N., Lynch, H. E., Ma, X., and Hutson, M. S. Enabling user-guided seg-  
649 mentation and tracking of surface-labeled cells in time-lapse image sets of living tissues.  
650 *Cytometry A*, 81A(5):409–418, 2012. 10.1002/cyto.a.22034.
- 651 [11] Cilla, R., Mechery, V., Hernandez de Madrid, B., Del Signore, S., Dotu, I., and Hatini, V.  
652 Segmentation and tracking of adherens junctions in 3D for the analysis of epithelial tissue  
653 morphogenesis. *PLoS Comput. Biol.*, 11(4):e1004124, 2015. 10.1371/journal.pcbi.1004124.
- 654 [12] Schiegg, M., Hanslovsky, P., Kausler, B., Hufnagel, L., and Hamprecht, F. Conservation  
655 tracking. *IEEE Int. Comp. Vis.*, 2928–2935, 2013. 10.1109/ICCV.2013.364.
- 656 [13] Heller, D., Hoppe, A., Restrepo, S., Gatti, L., Tournier, A., Tapon, N., Basler, K., and  
657 Mao, Y. EpiTools: An open-source image analysis toolkit for quantifying epithelial growth  
658 dynamics. *Dev. Cell*, 36(1):103–116, 2016. 10.1016/j.devcel.2015.12.012.
- 659 [14] Padfield, D., Rittscher, J., and Roysam, B. Coupled minimum-cost flow cell track-  
660 ing for high-throughput quantitative analysis. *Med. Image Anal.*, 15(4):650–668, 2011.  
661 10.1016/j.media.2010.07.006.

- 662 [15] Youssef, S., Gude, S., and Radler, J. O. Automated tracking in live-cell time-lapse movies.  
663 *Integr. Biol.*, 3:1095–1101, 2011. 10.1039/C1IB00035G.
- 664 [16] Wait, E., Winter, M., Bjornsson, C., Kokovay, E., Wang, Y., Goderie, S., Temple, S., and  
665 Cohen, A. Visualization and correction of automated segmentation, tracking and lineaging  
666 from 5-D stem cell image sequences. *BMC Bioinform.*, 15(1):328, 2014. 10.1186/1471-2105-  
667 15-328.
- 668 [17] Winter, M., Wait, E., Roysam, B., Goderie, S. K., Ali, R. A. N., Kokovay, E., Temple, S.,  
669 and Cohen, A. R. Vertebrate neural stem cell segmentation, tracking and lineaging with  
670 validation and editing. *Nat. Protocols*, 6(12):1942–1952, 2011. 10.1038/nprot.2011.422.
- 671 [18] Sommer, C., Straehle, C., Köthe, U., and Hamprecht, F. A. Ilastik: Interactive learning  
672 and segmentation toolkit. In 2011 IEEE International Symposium on Biomedical Imaging:  
673 From Nano to Macro, 230–233. 2011. 10.1109/ISBI.2011.5872394.
- 674 [19] Liu, K., Lienkamp, S. S., Shindo, A., Wallingford, J. B., Walz, G., and Ronneberger,  
675 O. Optical flow guided cell segmentation and tracking in developing tissue. In 2014  
676 IEEE 11th International Symposium on Biomedical Imaging (ISBI), 298–301. 2014.  
677 10.1109/ISBI.2014.6867868.
- 678 [20] Bellaiche, Y., Bosveld, F., Graner, F., Mikula, K., Remesikova, M., and Smisek, M. New  
679 robust algorithm for tracking cells in videos of *Drosophila* morphogenesis based on finding  
680 an ideal path in segmented spatio-temporal cellular structures. In IEEE Annu. Int. Conf.  
681 Eng. Med. Biol. Soc., 6609–6612. 2011. 10.1109/IEMBS.2011.6091630.
- 682 [21] Aly, A. A., Deris, S. B., and Zaki, N. Intelligent algorithms for cell tracking and image  
683 segmentation. *Int. J. Comput. Sci. Inf. Technol.*, 6(5):21–37, 2014.
- 684 [22] Wang, Q., Niemi, J., Tan, C.-M., You, L., and West, M. Image segmentation and dynamic  
685 lineage analysis in single-cell fluorescence microscopy. *Cytometry A*, 77A(1):101–110, 2010.  
686 10.1002/cyto.a.20812.
- 687 [23] Raffel, M., Willert, C. E., Wereley, S., and Kompenhans, J. Particle Image Velocimetry:  
688 A Practical Guide. Springer-Verlag Berlin Heidelberg, 2007.



- 689 [24] Puliafito, A., Hufnagel, L., Neveu, P., Streichan, S., Sigal, A., Fygenson, D. K., and  
690 Shraiman, B. I. Collective and single cell behavior in epithelial contact inhibition. Proc.  
691 Natl. Acad. Sci. U.S.A., 109(3):739–744, 2012. 10.1073/pnas.1007809109.
- 692 [25] Al-Kofahi, Y., Lassoued, W., Lee, W., and Roysam, B. Improved automatic detection  
693 and segmentation of cell nuclei in histopathology images. IEEE Trans. Biomed. Eng.,  
694 57(4):841–852, 2010. 10.1109/TBME.2009.2035102.
- 695 [26] Amat, F., Lemon, W., Mossing, D. P., McDole, K., Wan, Y., Branson, K., Myers, E. W.,  
696 and Keller, P. J. Fast, accurate reconstruction of cell lineages from large-scale fluorescence  
697 microscopy data. Nat. Meth., 11(9):951–958, 2014. 10.1038/nmeth.3036.
- 698 [27] Aigouy, B., Farhadifar, R., Staple, D. B., Sagner, A., Röper, J.-C., Jülicher, F., and Eaton,  
699 S. Cell flow reorients the axis of planar polarity in the wing epithelium of *Drosophila*. Cell,  
700 142(5):773–786, 2010. 10.1016/j.cell.2010.07.042.
- 701 [28] Hoebe, R. A., Van Oven, C. H., Gadella, T. W. J., Dhonukshe, P. B., Van Noorden, C.  
702 J. F., and Manders, E. M. M. Controlled light-exposure microscopy reduces photobleaching  
703 and phototoxicity in fluorescence live-cell imaging. Nat. Biotech., 25(2):249–253, 2007.  
704 10.1038/nbt1278.
- 705 [29] Wood, W. and Jacinto, A. Cell Migration: Developmental Methods and Protocols, chapter  
706 Imaging Cell Movement During Dorsal Closure in *Drosophila* Embryos, 203–210. Humana  
707 Press, Totowa, NJ, 2005. 10.1385/1-59259-860-9:203.
- 708 [30] Mavrakis, M., Rikhy, R., Lilly, M., and Lippincott-Schwartz, J. Fluorescence Imaging  
709 Techniques for Studying *Drosophila* Embryo Development. John Wiley & Sons, Inc., 2001.  
710 10.1002/0471143030.cb0418s39.
- 711 [31] Farhadifar, R., Röper, J.-C., Aigouy, B., Eaton, S., and Jülicher, F. The influence of  
712 cell mechanics, cell-cell interactions, and proliferation on epithelial packing. Curr. Biol.,  
713 17(24):2095–2104, 2007. 10.1016/j.cub.2007.11.049.
- 714 [32] Escudero, L. M., da F. Costa, L., Kicheva, A., Briscoe, J., Freeman, M., and Babu, M. M.  
715 Epithelial organisation revealed by a network of cellular contacts. Nat. Commun., 2:526,  
716 2011. 10.1038/ncomms1536.

- 717 [33] Sánchez-Gutiérrez, D., Tozluoglu, M., Barry, J. D., Pascual, A., Mao, Y., and Escudero,  
718 L. M. Fundamental physical cellular constraints drive self-organization of tissues. *EMBO*  
719 *J.*, 2015. 10.15252/emboj.201592374.
- 720 [34] Sáez, A., Acha, B., Montero-Sánchez, A., Rivas, E., Escudero, L. M., and Serrano, C.  
721 Neuromuscular disease classification system. *J. Biomed. Opt.*, 18(6):066017–066017, 2013.  
722 10.1117/1.JBO.18.6.066017.
- 723 [35] Ullmann, J. R. An algorithm for subgraph isomorphism. *JACM*, 23(1):31–42, 1976.  
724 10.1145/321921.321925.
- 725 [36] Krissinel, E. B. and Henrick, K. Common subgraph isomorphism detection by backtracking  
726 search. *Software Pract. Exper.*, 34(6):591–607, 2004. 10.1002/spe.588.
- 727 [37] Wilson, R. *An Introduction to Graph Theory*. Prentice Hall, 5th edition, 2010.
- 728 [38] Raymond, J. W. and Willett, P. Maximum common subgraph isomorphism algorithms for  
729 the matching of chemical structures. *J. Comput.-Aided Mol. Des.*, 16(7):521–533, 2002.  
730 10.1023/A:1021271615909.
- 731 [39] Osborne, J. M., Bernabeu, M. O., Bruna, M., Calderhead, B., Cooper, J., Dalchau, N.,  
732 Dunn, S.-J., Fletcher, A. G., Freeman, R., Groen, D., et al. Ten simple rules for effec-  
733 tive computational research. *PLoS Comput. Biol.*, 10(3):e1003506, 2014. 10.1371/jour-  
734 nal.pcbi.1003506.
- 735 [40] Hagberg, A. A., Schult, D. A., and Swart, P. J. Exploring network structure, dynamics,  
736 and function using NetworkX. In *Proceedings of the 7th Python in Science Conference*  
737 *(SciPy2008)*, 11–15. Pasadena, CA USA, 2008.
- 738 [41] Honda, H. Description of cellular patterns by Dirichlet domains: The two-dimensional  
739 case. *J. Theor. Biol.*, 72(3):523–543, 1978. 10.1016/0022-5193(78)90315-6.
- 740 [42] Narciso, C., Wu, Q., Brodskiy, P., Garston, G., Baker, R., Fletcher, A., and Zartman, J.  
741 Patterning of wound-induced intercellular Ca<sup>2+</sup> flashes in a developing epithelium. *Phys.*  
742 *Biol.*, 12(5):056005, 2015. 10.1088/1478-3975/12/5/056005.

- 743 [43] Parton, R. M., Vallés, A. M., Dobbie, I. M., and Davis, I. Collection and mounting of  
744 *Drosophila* embryos for imaging. Cold Spring Harbor Protocols, 2010(4):pdb.prot5403,  
745 2010. 10.1101/pdb.prot5403.
- 746 [44] Nagai, T., Kawasaki, K., and Nakamura, K. Vertex dynamics of two-dimensional cellular  
747 patterns. J. Phys. Soc. Jpn., 57(7):2221–2224, 1988. 10.1143/JPSJ.57.2221.
- 748 [45] Etournay, R., Popović, M., Merkel, M., Nandi, A., Blasse, C., Aigouy, B., Brandl, H.,  
749 Myers, G., Salbreux, G., Jülicher, F., et al. Interplay of cell dynamics and epithe-  
750 lial tension during morphogenesis of the *Drosophila* pupal wing. eLife, 4:e07090, 2015.  
751 10.7554/eLife.07090.
- 752 [46] Warn, R. and Magrath, R. F-actin distribution during the cellularization of the  
753 drosophila embryo visualized with FL-phalloidin. Exp. Cell Res., 143(1):103 – 114, 1983.  
754 [http://dx.doi.org/10.1016/0014-4827\(83\)90113-1](http://dx.doi.org/10.1016/0014-4827(83)90113-1).
- 755 [47] Classen, A.-K., Anderson, K. I., Marois, E., and Eaton, S. Hexagonal packing of *Drosophila*  
756 wing epithelial cells by the planar cell polarity pathway. Dev. Cell, 9(6):805–817, 2005.  
757 10.1016/j.devcel.2005.10.016.
- 758 [48] Ciriello, G., Mina, M., Guzzi, P. H., Cannataro, M., and Guerra, C. Alignnemo: A local  
759 network alignment method to integrate homology and topology. PLoS ONE, 7(6):e38107,  
760 2012. 10.1371/journal.pone.0038107.
- 761 [49] Aladağ, A. E. and Erten, C. Spinal: scalable protein interaction network alignment. Bioin-  
762 formatics, 29(7):917–924, 2013. 10.1093/bioinformatics/btt071.
- 763 [50] Trichas, G., Smith, A. M., White, N., Wilkins, V., Watanabe, T., Moore, A., Joyce,  
764 B., Sugnaseelan, J., Rodriguez, T. A., Kay, D., et al. Multi-cellular rosettes in the mouse  
765 visceral endoderm facilitate the ordered migration of anterior visceral endoderm cells. PLoS  
766 Biol., 10(2):e1001256, 2012. 10.1371/journal.pbio.1001256.
- 767 [51] Maška, M., Ulman, V., Svoboda, D., Matula, P., Matula, P., Ederra, C., Urbiola, A.,  
768 España, T., Venkatesan, S., Balak, D. M., et al. A benchmark for comparison of cell track-  
769 ing algorithms. Bioinformatics, 30(11):1609–1617, 2014. 10.1093/bioinformatics/btu080.

770 [52] Chenouard, N., Smal, I., de Chaumont, F., Maska, M., Sbalzarini, I. F., Gong, Y., Car-  
771 dinale, J., Carthel, C., Coraluppi, S., Winter, M., et al. Objective comparison of particle  
772 tracking methods. *Nat. Meth.*, 11(3):281–289, 2014. 10.1038/nmeth.2808.
